# Supplementary material for: Temephos Resistance in Aedes aegypti in Colombia Compromises Dengue Vector Control
Source: PLoS Negl Trop Dis. 2013 Sep 19;7(9):e2438. doi: 10.1371/journal.pntd.0002438 (PMC3777894; doi:10.1371/journal.pntd.0002438)
Supplement: Table S3 — a Summary of temephos resistance candidate genes resulting from the first microarray data filter, ‘Selection 1’. b. Summary of temephos resistance candidate genes resulting from the second microarray data filter, ‘Selection 2.’ c. Summary of temephos resistance candidate genes resulting from the third microarray data filter, ‘Selection 3.’ (XLSX) [file pntd.0002438.s004.xlsx]

## Sheet: Table S3a
			CucR vs NO					CucR vs BB
ProbeName	SystematicName	Vectorbase Description	regulation	FCAbsolute	Corrected p-value	p-value		regulation	FCAbsolute	Corrected p-value	p-value
CUST_7971_PI424980000	AAEL005526-RA	conserved hypothetical protein [Source:VB External Description;Acc:AAEL005526]	up	2.15189	0.00389617	0.0017129		up	2.42716	0.00070239	4.14698e-05
CUST_908_PI424980000	AAEL011230-RA	chymotrypsin, putative [Source:VB External Description;Acc:AAEL011230]	up	87.1405	2.30262e-05	1.29972e-07		up	28.3653	0.000434982	1.48901e-05
CUST_714_PI424980000	AAEL001418-RA	conserved hypothetical protein [Source:VB External Description;Acc:AAEL001418]	up	26.2441	3.91445e-05	5.67229e-07		up	4.70311	0.000636746	3.37042e-05
CUST_4382_PI424980000	AAEL014811-RA	conserved hypothetical protein [Source:VB External Description;Acc:AAEL014811]	up	18.3874	8.20005e-05	4.03314e-06		up	13.3518	0.000673107	3.75983e-05
CUST_4380_PI424980000	AAEL015657-RA	conserved hypothetical protein [Source:VB External Description;Acc:AAEL015657]	up	14.536	0.000162818	1.40879e-05		up	13.5121	0.00145202	0.000167879
CUST_8086_PI424980000	AAEL000555-RA	hypothetical protein [Source:VB External Description;Acc:AAEL000555]	up	13.6539	4.26692e-05	7.42405e-07		up	2.35372	0.00146198	0.000169322
CUST_1435_PI424980000	AAEL003076-RA	glucosyl/glucuronosyl transferases [Source:VB External Description;Acc:AAEL003076]	up	13.6481	2.58062e-05	2.15529e-07		up	16.0943	7.85784e-05	5.62642e-08
CUST_2875_PI424980000	AAEL001533-RA	glucosyl/glucuronosyl transferases [Source:VB External Description;Acc:AAEL001533]	up	13.0064	0.000269587	3.6716e-05		up	3.15876	0.00512453	0.00119918
CUST_4066_PI424980000	AAEL014843-RA	heat shock protein [Source:VB External Description;Acc:AAEL014843]	up	11.4998	2.32695e-05	1.66413e-07		up	6.20851	0.000263297	3.92282e-06
CUST_8863_PI424980000	AAEL012017-RA	hypothetical protein [Source:VB External Description;Acc:AAEL012017]	up	11.4334	0.000264382	3.52439e-05		up	2.03662	0.00710844	0.001924
CUST_2977_PI424980000	AAEL001668-RA	enolase [Source:VB External Description;Acc:AAEL001668]	up	11.3246	6.17361e-06	2.98422e-09		up	2.02345	0.00131436	0.000139952
CUST_458_PI424980000	AAEL010957-RA	serine collagenase 1 precursor, putative [Source:VB External Description;Acc:AAEL010957]	up	10.8544	9.40319e-05	5.30321e-06		up	4.19719	0.00198038	0.000274923
CUST_11872_PI424980000	AAEL008731-RA	hypothetical protein [Source:VB External Description;Acc:AAEL008731]	up	10.6094	2.83441e-05	2.56895e-07		up	2.47121	0.000434982	1.53029e-05
CUST_6260_PI424980000	AAEL010959-RA	serine collagenase 1 precursor, putative [Source:VB External Description;Acc:AAEL010959]	up	10.3832	0.000252761	3.26328e-05		up	6.00786	0.0012281	0.000125723
CUST_566_PI424980000	AAEL002813-RA	coupling factor, putative [Source:VB External Description;Acc:AAEL002813]	up	10.0991	8.15e-06	7.02103e-09		up	18.5366	7.85784e-05	3.61103e-08
CUST_67_PI424980000	AAEL014893-RA	cytochrome P450 [Source:VB External Description;Acc:AAEL014893]	up	8.6344	6.04191e-06	2.1896e-09		up	9.1499	0.000434982	1.55228e-05
CUST_1149_PI424980000	AAEL011704-RA	heat shock protein [Source:VB External Description;Acc:AAEL011704]	up	8.23451	5.57199e-05	1.47153e-06		up	2.19961	0.00137535	0.000153224
CUST_12636_PI424980000	AAEL013406-RA	venom allergen [Source:VB External Description;Acc:AAEL013406]	up	7.89948	5.39406e-05	1.27824e-06		up	4.23497	0.000610462	3.16545e-05
CUST_2673_PI424980000	AAEL013910-RA	conserved hypothetical protein [Source:VB External Description;Acc:AAEL013910]	up	7.87798	2.32695e-05	1.58422e-07		up	16.4561	0.00110653	0.000102503
CUST_4795_PI424980000	AAEL006109-RA	conserved hypothetical protein [Source:VB External Description;Acc:AAEL006109]	up	7.76625	0.000153578	1.28244e-05		up	4.35885	0.000490425	1.97399e-05
CUST_9052_PI424980000	AAEL010609-RA	conserved hypothetical protein [Source:VB External Description;Acc:AAEL010609]	up	7.44496	0.00157756	0.000520452		up	3.40273	0.000701384	4.12261e-05
CUST_2674_PI424980000	AAEL013910-RB	conserved hypothetical protein [Source:VB External Description;Acc:AAEL013910]	up	7.41994	3.97368e-05	5.86493e-07		up	14.6152	0.000789234	5.12994e-05
CUST_492_PI424980000	AAEL012655-RA	sugar transporter [Source:VB External Description;Acc:AAEL012655]	up	7.17088	6.88596e-05	2.85271e-06		up	3.19129	0.00142118	0.000162195
CUST_2629_PI424980000	AAEL015010-RA	acetyl-coa synthetase [Source:VB External Description;Acc:AAEL015010]	up	7.11583	8.49164e-05	4.4331e-06		up	5.27427	7.85784e-05	4.14997e-08
CUST_4688_PI424980000	AAEL012278-RA	metalloprotease [Source:VB External Description;Acc:AAEL012278]	up	6.76507	1.23588e-05	2.56139e-08		up	3.43867	0.000102949	2.83232e-07
CUST_3383_PI424980000	AAEL015236-RA	signal recognition particle, 9kD-subunit, putative [Source:VB External Description;Acc:AAEL015236]	up	6.74583	4.80542e-05	1.02449e-06		up	5.79146	0.000957327	7.6055e-05
CUST_10996_PI424980000	AAEL011580-RA	conserved hypothetical protein [Source:VB External Description;Acc:AAEL011580]	up	6.74564	4.88106e-05	1.06054e-06		up	4.49885	0.000610203	3.08653e-05
CUST_1064_PI424980000	AAEL004646-RA	actin [Source:VB External Description;Acc:AAEL004646]	up	6.58133	0.00108508	0.000315309		up	18.0423	0.000371253	9.0345e-06
CUST_9844_PI424980000	AAEL010477-RA	conserved hypothetical protein [Source:VB External Description;Acc:AAEL010477]	up	6.38572	9.59514e-05	5.64369e-06		up	13.1385	0.000403887	1.16119e-05
CUST_843_PI424980000	AAEL011175-RA	alkaline phosphatase [Source:VB External Description;Acc:AAEL011175]	up	6.17759	6.53031e-05	2.52469e-06		up	12.774	0.000102949	2.39654e-07
CUST_12426_PI424980000	AAEL011176-RA	hypothetical protein [Source:VB External Description;Acc:AAEL011176]	up	5.98549	0.000148591	1.18872e-05		up	19.6414	0.000975722	8.02607e-05
CUST_11938_PI424980000	AAEL002889-RA	hypothetical protein [Source:VB External Description;Acc:AAEL002889]	up	5.78076	0.000748538	0.000187247		up	7.66597	0.000856964	5.99579e-05
CUST_3453_PI424980000	AAEL000520-RA	conserved hypothetical protein [Source:VB External Description;Acc:AAEL000520]	up	5.77128	0.00011044	7.22034e-06		up	2.95138	0.000719309	4.26164e-05
CUST_3_PI424980000	AAEL002005-RA	cytochrome P450 [Source:VB External Description;Acc:AAEL002005]	up	5.58327	4.80542e-05	1.02787e-06		up	4.92278	0.000496318	2.07924e-05
CUST_1554_PI424980000	AAEL010858-RA	AMP dependent ligase [Source:VB External Description;Acc:AAEL010858]	up	5.53991	9.73103e-05	5.82098e-06		up	8.88992	0.000102949	2.68755e-07
CUST_2070_PI424980000	AAEL001194-RA	fatty acid synthase [Source:VB External Description;Acc:AAEL001194]	up	5.4742	4.48852e-05	8.62447e-07		up	3.23371	0.000254553	3.50243e-06
CUST_460_PI424980000	AAEL011167-RA	cathepsin l [Source:VB External Description;Acc:AAEL011167]	up	5.43696	0.000943158	0.000260893		up	17.4955	0.000102949	2.33085e-07
CUST_558_PI424980000	AAEL005159-RA	latent nuclear antigen, putative [Source:VB External Description;Acc:AAEL005159]	up	5.21078	0.00021821	2.52761e-05		up	14.8147	0.000656358	3.55845e-05
CUST_4268_PI424980000	AAEL010248-RA	fibrillarin [Source:VB External Description;Acc:AAEL010248]	up	5.13391	5.62025e-05	1.53935e-06		up	4.80701	0.000262449	3.83861e-06
CUST_8489_PI424980000	AAEL005025-RA	U1 small nuclear ribonucleoprotein, putative [Source:VB External Description;Acc:AAEL005025]	up	5.10035	1.51954e-05	4.03987e-08		up	4.4409	0.000401607	1.13402e-05
CUST_1114_PI424980000	AAEL014436-RA	conserved hypothetical protein [Source:VB External Description;Acc:AAEL014436]	up	5.08079	9.03058e-05	4.99819e-06		up	5.21101	0.000416059	1.26239e-05
CUST_850_PI424980000	AAEL015070-RA	alkaline phosphatase [Source:VB External Description;Acc:AAEL015070]	up	5.07945	0.000205536	2.24538e-05		up	13.5021	0.000917293	6.96111e-05
CUST_11341_PI424980000	AAEL010906-RA	conserved hypothetical protein [Source:VB External Description;Acc:AAEL010906]	up	4.98102	0.000227568	2.69751e-05		up	3.82761	0.00558963	0.00136041
CUST_3759_PI424980000	AAEL007271-RA	basic helix-loop-helix zip transcription factor [Source:VB External Description;Acc:AAEL007271]	up	4.97068	0.000118348	8.09384e-06		up	4.10711	0.00141882	0.000161418
CUST_3471_PI424980000	AAEL005937-RA	ATP-binding cassette transporter [Source:VB External Description;Acc:AAEL005937]	up	4.84577	0.000310819	4.63129e-05		up	4.23221	0.000708294	4.18911e-05
CUST_181_PI424980000	AAEL007955-RA	glutathionetransferase [Source:VB External Description;Acc:AAEL007955]	up	4.83324	8.71833e-05	4.67787e-06		up	2.33289	0.00401693	0.000823678
CUST_5037_PI424980000	AAEL006820-RA	lipid storage droplets surface binding protein 2 (lsd2) [Source:VB External Description;Acc:AAEL006820]	up	4.71691	2.50211e-05	1.96541e-07		up	4.02552	0.000416059	1.25963e-05
CUST_10469_PI424980000	AAEL012119-RA	hypothetical protein [Source:VB External Description;Acc:AAEL012119]	up	4.6295	0.000206884	2.29296e-05		up	2.23336	0.000669923	3.73517e-05
CUST_2254_PI424980000	AAEL004708-RA	2-phosphodiesterase [Source:VB External Description;Acc:AAEL004708]	up	4.62866	5.98637e-05	1.85948e-06		up	2.99715	7.85784e-05	1.18446e-08
CUST_1437_PI424980000	AAEL003397-RA	mitochondrial ribosomal protein L17 [Source:VB External Description;Acc:AAEL003397]	up	4.60495	6.45318e-05	2.33952e-06		up	2.89748	0.00379722	0.000752504
CUST_7244_PI424980000	AAEL003099-RA	glucosyl/glucuronosyl transferases [Source:VB External Description;Acc:AAEL003099]	up	4.50477	7.34343e-05	3.38996e-06		up	3.94061	0.00204391	0.00028752
CUST_7973_PI424980000	AAEL003303-RA	conserved hypothetical protein [Source:VB External Description;Acc:AAEL003303]	up	4.47357	1.11314e-05	1.34518e-08		up	2.44741	0.00470554	0.00104048
CUST_2340_PI424980000	AAEL007725-RA	reticulocalbin [Source:VB External Description;Acc:AAEL007725]	up	4.43045	0.000322321	4.99132e-05		up	2.65123	0.00132583	0.00014193
CUST_13794_PI424980000	AAEL013263-RA	high affinity copper transporter, putative [Source:VB External Description;Acc:AAEL013263]	up	4.41498	0.00312428	0.00129388		up	9.73432	0.00228584	0.000348993
CUST_2642_PI424980000	AAEL007387-RA	conserved hypothetical protein [Source:VB External Description;Acc:AAEL007387]	up	4.40953	0.000177055	1.68725e-05		up	17.1505	0.000423359	1.33889e-05
CUST_10954_PI424980000	AAEL002913-RA	peroxisomal membrane protein 70 abcd3 [Source:VB External Description;Acc:AAEL002913]	up	4.40846	0.000111828	7.4867e-06		up	2.46764	0.00128857	0.000135883
CUST_170_PI424980000	AAEL001054-RA	glutathionetransferase [Source:VB External Description;Acc:AAEL001054]	up	4.40496	0.00024538	3.10173e-05		up	14.8929	0.000380424	9.66917e-06
CUST_169_PI424980000	AAEL001059-RA	glutathionetransferase [Source:VB External Description;Acc:AAEL001059]	up	4.37327	0.000553881	0.000116972		up	4.96628	0.00293158	0.000508413
CUST_8393_PI424980000	AAEL008723-RA	conserved hypothetical protein [Source:VB External Description;Acc:AAEL008723]	up	4.36224	0.000192129	1.98282e-05		up	2.01115	0.00320712	0.000583959
CUST_68_PI424980000	AAEL017539-RA	cytochrome P450 [Source:VB External Description;Acc:AAEL017539]	up	4.3449	0.000183811	1.83034e-05		up	3.18626	0.00118377	0.000116853
CUST_115_PI424980000	AAEL001960-RA	cytochrome P450 [Source:VB External Description;Acc:AAEL001960]	up	4.15622	8.94198e-05	4.8778e-06		up	2.54221	0.000558536	2.56356e-05
CUST_13746_PI424980000	AAEL002048-RA	histidyl-tRNA synthetase [Source:VB External Description;Acc:AAEL002048]	up	4.06406	0.000230325	2.77226e-05		up	2.62199	0.000725865	4.30794e-05
CUST_81_PI424980000	AAEL009124-RA	cytochrome P450 [Source:VB External Description;Acc:AAEL009124]	up	3.97718	1.63659e-05	4.94437e-08		up	4.39711	0.00084885	5.85038e-05
CUST_900_PI424980000	AAEL008214-RA	trypsin, putative [Source:VB External Description;Acc:AAEL008214]	up	3.96055	0.00844473	0.00442596		up	6.55984	0.00300444	0.00052506
CUST_13879_PI424980000	AAEL006600-RD	juvenile hormone-inducible protein, putative [Source:VB External Description;Acc:AAEL006600]	up	3.93575	0.00167168	0.000564633		up	4.73578	0.000930738	7.25362e-05
CUST_8744_PI424980000	AAEL003859-RA	leucine-rich transmembrane protein [Source:VB External Description;Acc:AAEL003859]	up	3.93411	0.000622301	0.000139576		up	2.45349	0.0053052	0.00126107
CUST_694_PI424980000	AAEL012866-RA	conserved hypothetical protein [Source:VB External Description;Acc:AAEL012866]	up	3.88044	8.08919e-06	5.44099e-09		up	4.37551	0.000380424	9.77398e-06
CUST_14163_PI424980000	AAEL013946-RA	conserved hypothetical protein [Source:VB External Description;Acc:AAEL013946]	up	3.87709	0.000163473	1.4438e-05		up	5.35438	0.00341885	0.000643119
CUST_14026_PI424980000	AAEL001331-RB	mannose-1-phosphate guanyltransferase [Source:VB External Description;Acc:AAEL001331]	up	3.82533	0.000171827	1.58226e-05		up	2.10315	0.000226544	2.81464e-06
CUST_76_PI424980000	AAEL009127-RA	cytochrome P450 [Source:VB External Description;Acc:AAEL009127]	up	3.81572	5.47151e-05	1.36143e-06		up	3.13289	0.000701384	4.11685e-05
CUST_13878_PI424980000	AAEL006600-RC	juvenile hormone-inducible protein, putative [Source:VB External Description;Acc:AAEL006600]	up	3.79373	0.00037393	6.40312e-05		up	4.45401	0.00017414	1.31631e-06
CUST_2453_PI424980000	AAEL009731-RA	epsilon-trimethyllysine 2-oxoglutarate dioxygenase [Source:VB External Description;Acc:AAEL009731]	up	3.79299	0.000466272	8.97794e-05		up	65.3472	0.000569371	2.64987e-05
CUST_14025_PI424980000	AAEL001331-RA	mannose-1-phosphate guanyltransferase [Source:VB External Description;Acc:AAEL001331]	up	3.78637	0.00026074	3.45657e-05		up	2.00041	0.000196623	1.97042e-06
CUST_370_PI424980000	AAEL005603-RA	trypsin [Source:VB External Description;Acc:AAEL005603]	up	3.77062	0.000847452	0.00022213		up	2.96909	0.000957327	7.64222e-05
CUST_2081_PI424980000	AAEL005471-RA	Sec61 protein complex gamma subunit, putative [Source:VB External Description;Acc:AAEL005471]	up	3.75887	0.00110863	0.00032475		up	6.00537	0.000958502	7.75541e-05
CUST_6864_PI424980000	AAEL009759-RA	conserved hypothetical protein [Source:VB External Description;Acc:AAEL009759]	up	3.74074	2.14945e-05	9.61082e-08		up	2.55435	0.00027579	4.91575e-06
CUST_9856_PI424980000	AAEL007799-RB	regulator of chromosome condensation [Source:VB External Description;Acc:AAEL007799]	up	3.73827	0.000152289	1.25746e-05		up	2.2678	0.000751044	4.51907e-05
CUST_9855_PI424980000	AAEL007799-RA	regulator of chromosome condensation [Source:VB External Description;Acc:AAEL007799]	up	3.73545	0.000178469	1.70813e-05		up	2.21456	0.000429435	1.41642e-05
CUST_9675_PI424980000	AAEL000922-RA	polyribonucleotide nucleotidyltransferase [Source:VB External Description;Acc:AAEL000922]	up	3.64147	0.000661647	0.000155518		up	3.04504	0.00271243	0.00045517
CUST_2723_PI424980000	AAEL008386-RA	ATP-binding cassette sub-family A member 3, putative [Source:VB External Description;Acc:AAEL008386]	up	3.63919	0.000635585	0.000144422		up	2.50241	0.0018646	0.000248128
CUST_5859_PI424980000	AAEL004455-RA	conserved hypothetical protein [Source:VB External Description;Acc:AAEL004455]	up	3.61879	6.709e-05	2.74772e-06		up	2.15639	0.00132321	0.00014103
CUST_13180_PI424980000	AAEL010640-RA	phosphoribosylamine-glycine ligase [Source:VB External Description;Acc:AAEL010640]	up	3.50148	0.000172739	1.60008e-05		up	2.49424	0.0019171	0.000261413
CUST_8512_PI424980000	AAEL008857-RA	deoxyribonuclease I, putative [Source:VB External Description;Acc:AAEL008857]	up	3.48619	9.80003e-05	5.8927e-06		up	2.10002	0.00381938	0.000759685
CUST_7628_PI424980000	AAEL008651-RA	conserved hypothetical protein [Source:VB External Description;Acc:AAEL008651]	up	3.44622	0.000676524	0.000161058		up	28.4419	0.000393545	1.08909e-05
CUST_3562_PI424980000	AAEL003654-RA	conserved hypothetical protein [Source:VB External Description;Acc:AAEL003654]	up	3.41491	5.28226e-05	1.21284e-06		up	2.1883	0.00204294	0.000287174
CUST_9363_PI424980000	AAEL010613-RA	conserved hypothetical protein [Source:VB External Description;Acc:AAEL010613]	up	3.37749	0.000403848	7.15946e-05		up	2.35788	0.00439073	0.000935587
CUST_4215_PI424980000	AAEL005045-RA	ATP-dependent bile acid permease [Source:VB External Description;Acc:AAEL005045]	up	3.37536	9.28454e-05	5.20607e-06		up	2.60687	0.00054408	2.45252e-05
CUST_3554_PI424980000	AAEL004859-RA	ATP-dependent RNA helicase [Source:VB External Description;Acc:AAEL004859]	up	3.37377	1.59179e-05	4.61667e-08		up	3.97963	0.00268	0.000446439
CUST_74_PI424980000	AAEL014684-RA	cytochrome P450 [Source:VB External Description;Acc:AAEL014684]	up	3.35463	3.91445e-05	5.57508e-07		up	7.22169	0.000164004	8.70245e-07
CUST_8137_PI424980000	AAEL012493-RA	attractin [Source:VB External Description;Acc:AAEL012493]	up	3.3394	0.000778536	0.000197762		up	5.42849	0.000489866	1.95665e-05
CUST_13884_PI424980000	AAEL001091-RA	malic enzyme [Source:VB External Description;Acc:AAEL001091]	up	3.29557	0.000613195	0.000136348		up	4.3948	0.00155687	0.000189273
CUST_10273_PI424980000	AAEL005199-RA	hypothetical protein [Source:VB External Description;Acc:AAEL005199]	up	3.22888	0.000449687	8.45031e-05		up	222.727	0.000159425	7.53008e-07
CUST_8991_PI424980000	AAEL000813-RA	dimethylaniline monooxygenase [Source:VB External Description;Acc:AAEL000813]	up	3.22796	0.000177055	1.69032e-05		up	2.53871	0.00149823	0.000176914
CUST_4910_PI424980000	AAEL007987-RA	SEC63 protein, putative [Source:VB External Description;Acc:AAEL007987]	up	3.22748	0.0013502	0.000422439		up	2.2883	0.00535318	0.00127852
CUST_2125_PI424980000	AAEL014426-RA	glycine dehydrogenase [Source:VB External Description;Acc:AAEL014426]	up	3.22711	0.00150484	0.000487367		up	2.1034	0.00134207	0.000145225
CUST_14131_PI424980000	AAEL010118-RA	kelch repeat protein [Source:VB External Description;Acc:AAEL010118]	up	3.20444	2.65049e-05	2.27413e-07		up	2.03001	0.000771487	4.84012e-05
CUST_6232_PI424980000	AAEL001400-RA	DNA-directed RNA polymerases III 12.5 kDa polypeptide, putative [Source:VB External Description;Acc:AAEL001400]	up	3.18509	0.000326865	5.09948e-05		up	3.60971	0.00347065	0.000661415
CUST_1568_PI424980000	AAEL012100-RA	conserved hypothetical protein [Source:VB External Description;Acc:AAEL012100]	up	3.17689	8.31073e-05	4.1177e-06		up	3.11337	0.00114382	0.000108958
CUST_1143_PI424980000	AAEL001256-RA	hypothetical protein [Source:VB External Description;Acc:AAEL001256]	up	3.15521	0.000483016	9.44436e-05		up	7.69032	0.000266906	4.59053e-06
CUST_2177_PI424980000	AAEL013693-RA	excision repair cross-complementing 1 ercc1 [Source:VB External Description;Acc:AAEL013693]	up	3.13403	0.000131764	9.82457e-06		up	3.35138	0.00128124	0.000134073
CUST_6631_PI424980000	AAEL012457-RA	alcohol dehydrogenase [Source:VB External Description;Acc:AAEL012457]	up	3.12521	0.000302571	4.43892e-05		up	2.69245	0.000701384	4.09397e-05
CUST_6193_PI424980000	AAEL001813-RA	sodium/solute symporter [Source:VB External Description;Acc:AAEL001813]	up	3.08389	0.00021821	2.52646e-05		up	2.69712	0.00115937	0.000112616
CUST_10554_PI424980000	AAEL007254-RA	metalloprotease [Source:VB External Description;Acc:AAEL007254]	up	3.05184	4.12061e-05	6.44435e-07		up	2.37882	0.00677804	0.00180256
CUST_1303_PI424980000	AAEL003516-RA	conserved hypothetical protein [Source:VB External Description;Acc:AAEL003516]	up	3.01999	2.32695e-05	1.68918e-07		up	3.10989	0.00144608	0.000166528
CUST_3319_PI424980000	AAEL013114-RA	DNA-J, putative [Source:VB External Description;Acc:AAEL013114]	up	2.99986	0.000206025	2.26316e-05		up	2.19257	0.00035249	8.18078e-06
CUST_5867_PI424980000	AAEL001412-RA	conserved hypothetical protein [Source:VB External Description;Acc:AAEL001412]	up	2.99508	4.5852e-05	9.01645e-07		up	2.54909	0.000369819	8.92366e-06
CUST_5194_PI424980000	AAEL007323-RA	deoxyuridine 5'-triphosphate nucleotidohydrolase [Source:VB External Description;Acc:AAEL007323]	up	2.98679	4.12061e-05	6.52327e-07		up	3.34894	0.00268929	0.000449549
CUST_791_PI424980000	AAEL000859-RA	hypothetical protein [Source:VB External Description;Acc:AAEL000859]	up	2.97572	0.00135503	0.000424275		up	3.89058	0.000558536	2.56285e-05
CUST_10869_PI424980000	AAEL007999-RA	conserved hypothetical protein [Source:VB External Description;Acc:AAEL007999]	up	2.9455	0.000209675	2.36407e-05		up	2.39705	0.00201341	0.000281162
CUST_3531_PI424980000	AAEL012185-RA	ribosome biogenesis regulatory protein [Source:VB External Description;Acc:AAEL012185]	up	2.92532	6.45318e-05	2.33405e-06		up	2.77432	0.000380424	9.75589e-06
CUST_2191_PI424980000	AAEL008124-RA	possible RNA methyltransferase, putative [Source:VB External Description;Acc:AAEL008124]	up	2.92083	0.000812424	0.000209709		up	2.54533	0.000266906	4.3246e-06
CUST_11629_PI424980000	AAEL012032-RA	hypothetical protein [Source:VB External Description;Acc:AAEL012032]	up	2.91269	2.92283e-05	3.14221e-07		up	3.58234	0.00361946	0.000700402
CUST_2190_PI424980000	AAEL004063-RA	WD-repeat protein [Source:VB External Description;Acc:AAEL004063]	up	2.90014	4.13903e-05	6.76921e-07		up	2.50142	0.000501866	2.11795e-05
CUST_11286_PI424980000	AAEL003886-RA	conserved hypothetical protein [Source:VB External Description;Acc:AAEL003886]	up	2.88636	3.91392e-05	5.29738e-07		up	2.26115	0.00136305	0.000150424
CUST_4616_PI424980000	AAEL007880-RA	ornithine decarboxylase [Source:VB External Description;Acc:AAEL007880]	up	2.8724	0.000547161	0.000115001		up	9.57614	0.000115625	4.27404e-07
CUST_10896_PI424980000	AAEL013230-RA	coatomer delta subunit [Source:VB External Description;Acc:AAEL013230]	up	2.86474	0.000130946	9.73192e-06		up	2.08453	0.000423359	1.33801e-05
CUST_3098_PI424980000	AAEL009118-RA	histone H2A, putative [Source:VB External Description;Acc:AAEL009118]	up	2.83779	0.000272106	3.72563e-05		up	6.71234	0.0004004	1.11416e-05
CUST_9767_PI424980000	AAEL014741-RA	serine/threonine-protein kinase ripk4 [Source:VB External Description;Acc:AAEL014741]	up	2.80625	0.00172556	0.000589505		up	4.69345	0.00189388	0.00025624
CUST_1936_PI424980000	AAEL007512-RA	ATP-dependent RNA and DNA helicase [Source:VB External Description;Acc:AAEL007512]	up	2.80075	0.000163473	1.44352e-05		up	3.21836	0.000806222	5.31746e-05
CUST_2600_PI424980000	AAEL002322-RA	conserved hypothetical protein [Source:VB External Description;Acc:AAEL002322]	up	2.79367	0.000369579	6.1723e-05		up	3.03957	0.00205258	0.000289794
CUST_12940_PI424980000	AAEL015449-RA	ribosome biogenesis protein brix [Source:VB External Description;Acc:AAEL015449]	up	2.79126	0.000593208	0.000129108		up	2.0216	0.00140382	0.000159136
CUST_3069_PI424980000	AAEL014507-RA	peptide n-glycanase (pngase) [Source:VB External Description;Acc:AAEL014507]	up	2.79079	0.00114797	0.000340297		up	2.09853	0.00133684	0.000144177
CUST_2981_PI424980000	AAEL000497-RA	histone H2A [Source:VB External Description;Acc:AAEL000497]	up	2.78081	0.000118098	8.01281e-06		up	2.61556	0.000775539	4.9372e-05
CUST_9610_PI424980000	AAEL011925-RA	mitochondrial ribosomal protein, S31, putative [Source:VB External Description;Acc:AAEL011925]	up	2.77968	0.000572997	0.000122839		up	3.74938	0.000258129	3.65765e-06
CUST_234_PI424980000	AAEL000898-RA	no description available	up	2.77803	0.00112455	0.000330502		up	2.05448	0.00722969	0.00197207
CUST_13960_PI424980000	AAEL011527-RA	eukaryotic translation initiation factor [Source:VB External Description;Acc:AAEL011527]	up	2.76004	0.000271685	3.71658e-05		up	2.21383	0.00129394	0.000136952
CUST_9257_PI424980000	AAEL007988-RA	conserved hypothetical protein [Source:VB External Description;Acc:AAEL007988]	up	2.74983	6.20535e-05	2.07753e-06		up	2.20161	0.00100861	8.8133e-05
CUST_13364_PI424980000	AAEL012031-RA	conserved hypothetical protein [Source:VB External Description;Acc:AAEL012031]	up	2.73558	0.00344861	0.00147696		up	2.03341	0.00645564	0.00167705
CUST_13857_PI424980000	AAEL008281-RA	conserved hypothetical protein [Source:VB External Description;Acc:AAEL008281]	up	2.7307	0.000347474	5.62676e-05		up	3.37126	0.000783058	5.05642e-05
CUST_6829_PI424980000	AAEL011217-RA	conserved hypothetical protein [Source:VB External Description;Acc:AAEL011217]	up	2.71483	0.000284589	3.97139e-05		up	2.4045	0.00133004	0.000143124
CUST_2520_PI424980000	AAEL000300-RA	WD-repeat protein [Source:VB External Description;Acc:AAEL000300]	up	2.71169	0.000233994	2.84752e-05		up	2.08551	0.000601219	3.01755e-05
CUST_4506_PI424980000	AAEL007864-RA	zinc finger protein [Source:VB External Description;Acc:AAEL007864]	up	2.68055	0.000609408	0.000135138		up	3.14878	0.00059206	2.89373e-05
CUST_366_PI424980000	AAEL005127-RA	ribonuclease UK114, putative [Source:VB External Description;Acc:AAEL005127]	up	2.67995	0.00146829	0.000472011		up	5.1012	0.000932619	7.29163e-05
CUST_6426_PI424980000	AAEL007229-RA	conserved hypothetical protein [Source:VB External Description;Acc:AAEL007229]	up	2.66735	4.88106e-05	1.06174e-06		up	2.1164	0.00148038	0.000173419
CUST_11222_PI424980000	AAEL012990-RA	mrg-binding protein [Source:VB External Description;Acc:AAEL012990]	up	2.66079	0.000919458	0.000251115		up	4.75308	0.000310398	6.1831e-06
CUST_13191_PI424980000	AAEL003424-RA	zinc carboxypeptidase [Source:VB External Description;Acc:AAEL003424]	up	2.64919	0.000205399	2.23429e-05		up	2.50309	0.000937369	7.36305e-05
CUST_9313_PI424980000	AAEL000412-RA	conserved hypothetical protein [Source:VB External Description;Acc:AAEL000412]	up	2.64826	0.000280101	3.88587e-05		up	2.06472	0.0011468	0.000110292
CUST_700_PI424980000	AAEL005270-RA	conserved hypothetical protein [Source:VB External Description;Acc:AAEL005270]	up	2.64575	0.000241376	3.01381e-05		up	2.14887	0.00212504	0.000306049
CUST_6878_PI424980000	AAEL004558-RA	tRNA (guanine-N(7)-)-methyltransferase subunit wuho [Source:VB External Description;Acc:AAEL004558]	up	2.63855	0.000112483	7.54415e-06		up	2.3212	0.000416059	1.26454e-05
CUST_5244_PI424980000	AAEL003394-RA	conserved hypothetical protein [Source:VB External Description;Acc:AAEL003394]	up	2.6308	4.5852e-05	9.19811e-07		up	2.00554	0.00796287	0.00226892
CUST_9759_PI424980000	AAEL001238-RA	bap28 [Source:VB External Description;Acc:AAEL001238]	up	2.60532	0.000402229	7.11131e-05		up	3.27761	0.00305774	0.000541584
CUST_9249_PI424980000	AAEL004526-RA	conserved hypothetical protein [Source:VB External Description;Acc:AAEL004526]	up	2.58424	0.000121012	8.3941e-06		up	2.59362	0.000610203	3.12157e-05
CUST_6761_PI424980000	AAEL014388-RA	conserved hypothetical protein [Source:VB External Description;Acc:AAEL014388]	up	2.57378	6.1303e-05	2.00042e-06		up	2.15679	0.000196623	2.05809e-06
CUST_6802_PI424980000	AAEL012251-RA	low-density lipoprotein receptor (ldl) [Source:VB External Description;Acc:AAEL012251]	up	2.54726	0.00062717	0.000141578		up	2.5845	0.00492063	0.00112469
CUST_1833_PI424980000	AAEL002993-RA	39S ribosomal protein L43 [Source:VB External Description;Acc:AAEL002993]	up	2.54532	0.000561574	0.000119373		up	3.75653	0.0011482	0.000110588
CUST_5933_PI424980000	AAEL012265-RA	transcription initiation factor RRN3 [Source:VB External Description;Acc:AAEL012265]	up	2.52964	0.001716	0.000584787		up	2.40241	0.0049582	0.00114036
CUST_10742_PI424980000	AAEL012707-RA	conserved hypothetical protein [Source:VB External Description;Acc:AAEL012707]	up	2.52639	0.000199689	2.10017e-05		up	3.41553	0.000467176	1.84129e-05
CUST_6746_PI424980000	AAEL003949-RA	conserved hypothetical protein [Source:VB External Description;Acc:AAEL003949]	up	2.50363	0.000310151	4.59885e-05		up	2.54886	0.001683	0.000212903
CUST_12381_PI424980000	AAEL004509-RA	conserved hypothetical protein [Source:VB External Description;Acc:AAEL004509]	up	2.50225	0.000659076	0.000153957		up	3.99568	0.000610203	3.1036e-05
CUST_8015_PI424980000	AAEL007005-RA	histone H2A [Source:VB External Description;Acc:AAEL007005]	up	2.50098	0.000264382	3.52723e-05		up	2.11038	0.00524843	0.00124111
CUST_7381_PI424980000	AAEL014345-RA	conserved hypothetical protein [Source:VB External Description;Acc:AAEL014345]	up	2.49896	0.000593208	0.000129082		up	3.17259	0.000441631	1.60527e-05
CUST_13673_PI424980000	AAEL011708-RA	heat shock protein [Source:VB External Description;Acc:AAEL011708]	up	2.48405	0.000136996	1.05562e-05		up	2.14883	0.000659391	3.61982e-05
CUST_8731_PI424980000	AAEL003863-RA	histone H4 [Source:VB External Description;Acc:AAEL003863]	up	2.48298	0.00557476	0.00265837		up	12.3108	0.000599301	2.98328e-05
CUST_9941_PI424980000	AAEL011518-RA	aspartyl-tRNA synthetase [Source:VB External Description;Acc:AAEL011518]	up	2.47716	0.000411475	7.38082e-05		up	6.44294	0.00207769	0.000296735
CUST_11686_PI424980000	AAEL007046-RA	mitochondrial brown fat uncoupling protein [Source:VB External Description;Acc:AAEL007046]	up	2.47655	0.00219227	0.000813062		up	3.58393	0.00264704	0.000437052
CUST_9025_PI424980000	AAEL012538-RA	conserved hypothetical protein [Source:VB External Description;Acc:AAEL012538]	up	2.47443	7.23221e-05	3.25122e-06		up	4.98199	0.00576947	0.0014206
CUST_6775_PI424980000	AAEL014713-RA	conserved hypothetical protein [Source:VB External Description;Acc:AAEL014713]	up	2.46857	0.000864434	0.000229088		up	5.44509	0.000678462	3.83027e-05
CUST_13398_PI424980000	AAEL011866-RA	DNA-directed RNA polymerase III 25 kDa polypeptide [Source:VB External Description;Acc:AAEL011866]	up	2.4589	0.000172901	1.60469e-05		up	2.04687	0.000496318	2.07245e-05
CUST_12054_PI424980000	AAEL008517-RA	elongation factor tu (ef-tu) [Source:VB External Description;Acc:AAEL008517]	up	2.42579	0.000116662	7.86673e-06		up	2.17293	0.000282511	5.36652e-06
CUST_10915_PI424980000	AAEL002670-RA	AMP dependent ligase [Source:VB External Description;Acc:AAEL002670]	up	2.42568	0.0019822	0.000712633		up	7.07653	0.000512616	2.21701e-05
CUST_11593_PI424980000	AAEL000482-RA	histone H3 [Source:VB External Description;Acc:AAEL000482]	up	2.412	0.000266779	3.61078e-05		up	4.27912	0.00228767	0.000349998
CUST_9100_PI424980000	AAEL007383-RD	secreted ferritin G subunit precursor, putative [Source:VB External Description;Acc:AAEL007383]	up	2.41042	0.000126406	9.08901e-06		up	2.34049	0.00110188	0.000101714
CUST_499_PI424980000	AAEL008844-RA	calcium-binding protein, putative [Source:VB External Description;Acc:AAEL008844]	up	2.40802	0.00106117	0.000305623		up	4.61782	0.00323442	0.000592729
CUST_9999_PI424980000	AAEL002439-RA	conserved hypothetical protein [Source:VB External Description;Acc:AAEL002439]	up	2.39386	0.00101766	0.000288511		up	2.33718	0.000326806	7.2275e-06
CUST_2398_PI424980000	AAEL004740-RA	35 kDa GTP-binding protein, putative [Source:VB External Description;Acc:AAEL004740]	up	2.38751	0.000284589	3.97184e-05		up	2.09409	0.000266906	4.30005e-06
CUST_4747_PI424980000	AAEL014845-RA	heat shock protein [Source:VB External Description;Acc:AAEL014845]	up	2.38686	0.000545329	0.000113942		up	2.21426	0.00132583	0.00014208
CUST_8699_PI424980000	AAEL002917-RA	conserved hypothetical protein [Source:VB External Description;Acc:AAEL002917]	up	2.37883	0.00034803	5.64681e-05		up	4.90645	0.00017414	1.15738e-06
CUST_73_PI424980000	AAEL014678-RA	cytochrome P450 [Source:VB External Description;Acc:AAEL014678]	up	2.3759	4.48852e-05	8.58376e-07		up	5.74338	0.00017414	1.1666e-06
CUST_9099_PI424980000	AAEL007383-RC	secreted ferritin G subunit precursor, putative [Source:VB External Description;Acc:AAEL007383]	up	2.37242	0.000172357	1.58923e-05		up	2.34343	0.000812507	5.40614e-05
CUST_3901_PI424980000	AAEL003823-RA	histone H4 [Source:VB External Description;Acc:AAEL003823]	up	2.36946	0.00383069	0.0016781		up	12.2102	0.000502566	2.13638e-05
CUST_9098_PI424980000	AAEL007383-RB	secreted ferritin G subunit precursor, putative [Source:VB External Description;Acc:AAEL007383]	up	2.3669	0.000118348	8.13776e-06		up	2.25681	0.00146423	0.000169892
CUST_7922_PI424980000	AAEL013685-RA	WD-repeat protein [Source:VB External Description;Acc:AAEL013685]	up	2.36582	0.000181782	1.77279e-05		up	4.29907	0.00189388	0.000256792
CUST_1633_PI424980000	AAEL000517-RA	histone H4 [Source:VB External Description;Acc:AAEL000517]	up	2.35763	0.00458175	0.00208779		up	8.81828	0.000491411	1.98437e-05
CUST_9097_PI424980000	AAEL007383-RA	secreted ferritin G subunit precursor, putative [Source:VB External Description;Acc:AAEL007383]	up	2.35185	0.000333699	5.2424e-05		up	2.41803	0.000467176	1.81587e-05
CUST_775_PI424980000	AAEL005156-RA	hypothetical protein [Source:VB External Description;Acc:AAEL005156]	up	2.33287	0.000370556	6.27372e-05		up	8.54253	0.000541244	2.41195e-05
CUST_5673_PI424980000	AAEL009757-RA	conserved hypothetical protein [Source:VB External Description;Acc:AAEL009757]	up	2.29164	0.0035573	0.00153433		up	3.79777	0.00345448	0.000656915
CUST_2414_PI424980000	AAEL003851-RA	histone H2A [Source:VB External Description;Acc:AAEL003851]	up	2.29044	0.000758182	0.000190851		up	6.74049	0.000883778	6.41576e-05
CUST_12617_PI424980000	AAEL009308-RA	WD-repeat protein [Source:VB External Description;Acc:AAEL009308]	up	2.28885	0.000118411	8.15638e-06		up	2.79433	0.00045195	1.68918e-05
CUST_6963_PI424980000	AAEL003899-RA	sugar transporter [Source:VB External Description;Acc:AAEL003899]	up	2.28471	0.00033504	5.31206e-05		up	6.46719	0.000434982	1.50543e-05
CUST_2306_PI424980000	AAEL012681-RA	60S ribosomal protein L24 [Source:VB External Description;Acc:AAEL012681]	up	2.28282	0.000200005	2.12438e-05		up	10.3383	0.000305903	6.06214e-06
CUST_9575_PI424980000	AAEL011559-RA	metalloproteinase, putative [Source:VB External Description;Acc:AAEL011559]	up	2.27922	0.00547627	0.0025975		up	3.56628	0.000789234	5.13738e-05
CUST_9531_PI424980000	AAEL012618-RA	conserved hypothetical protein [Source:VB External Description;Acc:AAEL012618]	up	2.27815	8.42559e-05	4.27688e-06		up	2.0977	0.000502643	2.14513e-05
CUST_6227_PI424980000	AAEL002861-RA	conserved hypothetical protein [Source:VB External Description;Acc:AAEL002861]	up	2.27682	0.00058563	0.000126538		up	3.88654	0.000599301	2.97838e-05
CUST_12705_PI424980000	AAEL003689-RA	histone H4 [Source:VB External Description;Acc:AAEL003689]	up	2.27645	0.00295011	0.0012025		up	6.94417	0.00156127	0.000189968
CUST_1281_PI424980000	AAEL003645-RA	stearoyl-coa desaturase [Source:VB External Description;Acc:AAEL003645]	up	2.27546	0.000457303	8.65493e-05		up	2.45777	0.000467176	1.82567e-05
CUST_13376_PI424980000	AAEL008942-RA	conserved hypothetical protein [Source:VB External Description;Acc:AAEL008942]	up	2.27433	7.08921e-05	3.12696e-06		up	3.03396	0.000585153	2.84796e-05
CUST_13940_PI424980000	AAEL003820-RA	histone H2A [Source:VB External Description;Acc:AAEL003820]	up	2.27229	0.000927647	0.000254696		up	6.43366	0.0011468	0.000109634
CUST_9340_PI424980000	AAEL002108-RA	nucleolar essential protein 1 (nep1) [Source:VB External Description;Acc:AAEL002108]	up	2.24231	0.000299895	4.37068e-05		up	2.02889	0.00017414	1.46621e-06
CUST_4687_PI424980000	AAEL003856-RA	histone H3 [Source:VB External Description;Acc:AAEL003856]	up	2.24161	0.000182443	1.79516e-05		up	2.73688	0.00218873	0.000321151
CUST_10070_PI424980000	AAEL007650-RA	chaperonin [Source:VB External Description;Acc:AAEL007650]	up	2.24024	0.00113212	0.000333002		up	4.30783	0.00234877	0.000362527
CUST_13861_PI424980000	AAEL003827-RA	histone H3 [Source:VB External Description;Acc:AAEL003827]	up	2.23863	0.000181024	1.75664e-05		up	2.80544	0.00205679	0.000291232
CUST_6228_PI424980000	AAEL002861-RB	conserved hypothetical protein [Source:VB External Description;Acc:AAEL002861]	up	2.23668	0.00113387	0.000333926		up	4.31463	0.000838428	5.75079e-05
CUST_12290_PI424980000	AAEL009080-RA	importin 7, [Source:VB External Description;Acc:AAEL009080]	up	2.22471	5.71946e-05	1.64375e-06		up	7.07089	0.00109334	0.000100364
CUST_10507_PI424980000	AAEL010698-RA	importin beta-4 [Source:VB External Description;Acc:AAEL010698]	up	2.21818	0.000207345	2.32155e-05		up	2.264	0.000115625	3.98417e-07
CUST_1204_PI424980000	AAEL005991-RA	tricarboxylate transport protein [Source:VB External Description;Acc:AAEL005991]	up	2.20993	0.000917453	0.000250456		up	4.37426	0.000873987	6.24597e-05
CUST_13503_PI424980000	AAEL012851-RA	WD-repeat protein [Source:VB External Description;Acc:AAEL012851]	up	2.20209	8.6511e-05	4.58953e-06		up	4.30691	0.000164004	9.06301e-07
CUST_3374_PI424980000	AAEL004778-RA	acyl-coa dehydrogenase [Source:VB External Description;Acc:AAEL004778]	up	2.19645	0.00568341	0.0027246		up	2.48726	0.000896061	6.56934e-05
CUST_7747_PI424980000	AAEL012689-RA	glucose-methanol-choline (gmc) oxidoreductase [Source:VB External Description;Acc:AAEL012689]	up	2.18418	0.000655043	0.000152382		up	3.45714	0.00121631	0.000123142
CUST_393_PI424980000	AAEL005611-RA	trypsin [Source:VB External Description;Acc:AAEL005611]	up	2.18369	0.00200483	0.000723809		up	2.27682	0.00234877	0.000361599
CUST_1921_PI424980000	AAEL008938-RB	hypothetical protein [Source:VB External Description;Acc:AAEL008938]	up	2.17273	0.00083745	0.000219004		up	2.58487	0.00935051	0.0028352
CUST_143_PI424980000	AAEL014617-RA	cytochrome P450 [Source:VB External Description;Acc:AAEL014617]	up	2.14973	0.000152497	1.26789e-05		up	2.66622	0.000266906	4.49337e-06
CUST_1574_PI424980000	AAEL007097-RA	4-nitrophenylphosphatase [Source:VB External Description;Acc:AAEL007097]	up	2.13765	0.00554234	0.00263688		up	31.898	0.000633017	3.33142e-05
CUST_6139_PI424980000	AAEL002002-RA	mitochondrial ribosomal protein, S18B, putative [Source:VB External Description;Acc:AAEL002002]	up	2.13703	0.00228934	0.00085916		up	3.60462	0.00146198	0.000169353
CUST_546_PI424980000	AAEL012228-RA	SspC, putative [Source:VB External Description;Acc:AAEL012228]	up	2.13477	0.0028637	0.00115552		up	3.61818	0.00121503	0.000122574
CUST_4664_PI424980000	AAEL002748-RA	aspartyl-tRNA synthetase [Source:VB External Description;Acc:AAEL002748]	up	2.12196	0.000148996	1.20277e-05		up	2.18414	0.000468917	1.85371e-05
CUST_5469_PI424980000	AAEL008572-RA	RNA-binding protein, putative [Source:VB External Description;Acc:AAEL008572]	up	2.10444	0.000546275	0.0001144		up	2.05829	0.000957327	7.6695e-05
CUST_2624_PI424980000	AAEL002307-RA	leucine-rich transmembrane protein [Source:VB External Description;Acc:AAEL002307]	up	2.09977	0.00072186	0.000177259		up	2.70485	0.00482932	0.00108448
CUST_11662_PI424980000	AAEL000728-RA	ribosomal protein S6 kinase [Source:VB External Description;Acc:AAEL000728]	up	2.09966	0.00166144	0.000559971		up	2.80433	0.00999389	0.00309334
CUST_10407_PI424980000	AAEL013610-RA	conserved hypothetical protein [Source:VB External Description;Acc:AAEL013610]	up	2.09495	0.000635492	0.000144042		up	2.12026	0.00392135	0.000789586
CUST_10891_PI424980000	AAEL001561-RB	conserved hypothetical protein [Source:VB External Description;Acc:AAEL001561]	up	2.08112	0.000647709	0.000149137		up	4.9595	0.000196266	1.86522e-06
CUST_7433_PI424980000	AAEL005877-RB	conserved hypothetical protein [Source:VB External Description;Acc:AAEL005877]	up	2.0743	0.000415465	7.52786e-05		up	2.23097	0.00132583	0.000142145
CUST_110_PI424980000	AAEL006793-RA	cytochrome P450 [Source:VB External Description;Acc:AAEL006793]	up	2.06716	5.47151e-05	1.41749e-06		up	2.05306	0.000756428	4.6602e-05
CUST_14097_PI424980000	AAEL014539-RA	maltose phosphorylase [Source:VB External Description;Acc:AAEL014539]	up	2.06313	0.00491478	0.00227179		up	2.01559	0.00303746	0.000533949
CUST_10649_PI424980000	AAEL003299-RA	hypothetical protein [Source:VB External Description;Acc:AAEL003299]	up	2.05743	0.000177055	1.68609e-05		up	2.09229	0.00214129	0.000311474
CUST_11536_PI424980000	AAEL012037-RA	sulphate transporter [Source:VB External Description;Acc:AAEL012037]	up	2.05509	0.000656341	0.000152842		up	2.58255	0.000569371	2.64367e-05
CUST_120_PI424980000	AAEL002043-RA	cytochrome P450 [Source:VB External Description;Acc:AAEL002043]	up	2.04548	0.00421984	0.00189345		up	2.79369	0.00100861	8.81078e-05
CUST_12910_PI424980000	AAEL011200-RA	conserved hypothetical protein [Source:VB External Description;Acc:AAEL011200]	up	2.04113	0.000333699	5.23975e-05		up	4.02082	0.000923527	7.17621e-05
CUST_165_PI424980000	AAEL001061-RB	glutathionetransferase [Source:VB External Description;Acc:AAEL001061]	up	2.0316	0.000668787	0.000158327		up	2.06412	0.00974266	0.00298712
CUST_12236_PI424980000	AAEL006386-RB	mitochondrial 39S ribosomal protein L39 [Source:VB External Description;Acc:AAEL006386]	up	2.02911	4.68185e-05	9.50515e-07		up	2.05339	0.000192365	1.73818e-06
CUST_12936_PI424980000	AAEL010030-RA	conserved hypothetical protein [Source:VB External Description;Acc:AAEL010030]	up	2.02348	0.00114039	0.000337411		up	2.43975	0.00176153	0.000230142
CUST_8258_PI424980000	AAEL007660-RA	suppressor of actin (sac) [Source:VB External Description;Acc:AAEL007660]	up	2.02057	0.000765347	0.000193236		up	2.31442	0.00924889	0.0027911
CUST_13720_PI424980000	AAEL004589-RA	small calcium-binding mitochondrial carrier, putative [Source:VB External Description;Acc:AAEL004589]	up	2.02008	0.00117753	0.000352191		up	2.90441	0.0025292	0.000408505
CUST_10893_PI424980000	AAEL001561-RD	conserved hypothetical protein [Source:VB External Description;Acc:AAEL001561]	up	2.01681	0.000485978	9.54925e-05		up	4.84728	0.000200575	2.22104e-06
CUST_10890_PI424980000	AAEL001561-RA	conserved hypothetical protein [Source:VB External Description;Acc:AAEL001561]	up	2.00938	0.000264743	3.54265e-05		up	4.93424	0.000208244	2.39484e-06
CUST_1985_PI424980000	AAEL014871-RA	methylenetetrahydrofolate dehydrogenase [Source:VB External Description;Acc:AAEL014871]	up	2.00794	9.00472e-05	4.973e-06		up	2.00414	0.00586989	0.00145376
CUST_14040_PI424980000	AAEL007618-RA	conserved hypothetical protein [Source:VB External Description;Acc:AAEL007618]	down	2.80856	0.00148982	0.000481062		up	2.42794	0.000380424	9.7601e-06
CUST_8817_PI424980000	AAEL005300-RA	conserved hypothetical protein [Source:VB External Description;Acc:AAEL005300]	down	2.81882	0.00105513	0.000302577		up	3.94016	0.00699924	0.00188151
CUST_10029_PI424980000	AAEL012882-RA	folylpolyglutamate synthase [Source:VB External Description;Acc:AAEL012882]	down	2.58704	0.000974996	0.000272881		up	2.13312	0.00455227	0.000987674
CUST_2800_PI424980000	AAEL005706-RA	triacylglycerol lipase [Source:VB External Description;Acc:AAEL005706]	down	2.28654	0.000714318	0.000174544		up	2.22989	0.0033654	0.000629264
CUST_9739_PI424980000	AAEL000225-RA	oviductin [Source:VB External Description;Acc:AAEL000225]	down	2.33437	0.00418695	0.00187413		up	4.86698	0.0049651	0.00114556
CUST_9643_PI424980000	AAEL012677-RA	conserved hypothetical protein [Source:VB External Description;Acc:AAEL012677]	down	2.36746	0.00049754	9.88218e-05		up	2.56462	0.000872042	6.19625e-05
CUST_139_PI424980000	AAEL003748-RA	cytochrome P450 [Source:VB External Description;Acc:AAEL003748]	down	2.67397	0.000790672	0.000201992		up	2.0144	0.000491647	1.99714e-05
CUST_3878_PI424980000	AAEL005687-RA	protein serine/threonine kinase, putative [Source:VB External Description;Acc:AAEL005687]	down	3.99985	0.00148599	0.00047875		up	5.56773	0.000102949	2.41466e-07
CUST_5980_PI424980000	AAEL002303-RA	conserved hypothetical protein [Source:VB External Description;Acc:AAEL002303]	down	4.16023	0.00019993	2.11164e-05		up	3.06969	0.00187323	0.000251473
CUST_13274_PI424980000	AAEL006581-RA	juvenile hormone-inducible protein, putative [Source:VB External Description;Acc:AAEL006581]	down	3.04085	0.000185606	1.86641e-05		up	3.12261	0.0068373	0.00182619
CUST_293_PI424980000	AAEL003933-RA	double oxidase, two peroxidase domains [Source:VB External Description;Acc:AAEL003933]	down	2.61888	0.00181511	0.000628216		up	2.73584	0.00808044	0.00232233
CUST_2885_PI424980000	AAEL005318-RA	hypothetical protein [Source:VB External Description;Acc:AAEL005318]	down	2.0682	0.00502085	0.00233417		up	2.61851	0.00420821	0.000884293
CUST_13151_PI424980000	AAEL003872-RA	Translationally-controlled tumor protein homolog (TCTP) [Source:VB External Description;Acc:AAEL003872]	down	4.07702	0.000206884	2.30137e-05		up	16.7401	0.000263297	3.94716e-06
CUST_2893_PI424980000	AAEL000670-RA	methionine sulfoxide reductase [Source:VB External Description;Acc:AAEL000670]	down	11.6897	6.32458e-05	2.19354e-06		up	7.98523	0.00444348	0.00095175
CUST_9691_PI424980000	AAEL005839-RA	uridine phosphorylase [Source:VB External Description;Acc:AAEL005839]	down	2.47547	0.000626835	0.000141373		up	2.00925	0.00266176	0.000440029
CUST_411_PI424980000	AAEL006627-RA	serine-type enodpeptidase, [Source:VB External Description;Acc:AAEL006627]	down	2.42402	0.00319821	0.00133648		up	37.3122	0.000434982	1.54503e-05
CUST_3788_PI424980000	AAEL002256-RA	collagen alpha 1(xviii) chain [Source:VB External Description;Acc:AAEL002256]	down	2.07927	0.00300739	0.00123276		up	2.3629	0.00209022	0.000299829
CUST_9557_PI424980000	AAEL010480-RA	serine-pyruvate aminotransferase [Source:VB External Description;Acc:AAEL010480]	down	5.32046	0.000757602	0.000190431		up	2.05924	0.00690366	0.00185156
CUST_5878_PI424980000	AAEL012691-RA	sodium/solute symporter [Source:VB External Description;Acc:AAEL012691]	down	2.50887	5.47151e-05	1.42066e-06		up	2.07465	0.000861168	6.0575e-05
CUST_1788_PI424980000	AAEL002517-RB	nucleoprotein, putative [Source:VB External Description;Acc:AAEL002517]	down	2.11091	0.00202361	0.000733392		up	2.0054	0.00473461	0.00104862
CUST_6831_PI424980000	AAEL007218-RA	conserved hypothetical protein [Source:VB External Description;Acc:AAEL007218]	down	2.43376	0.000432823	7.95035e-05		up	2.26912	0.00399849	0.000817434
CUST_12120_PI424980000	AAEL001242-RA	ribosomal pseudouridine synthase [Source:VB External Description;Acc:AAEL001242]	down	2.25999	0.000222524	2.60575e-05		up	2.36518	0.00370681	0.000724869
CUST_62_PI424980000	AAEL006989-RA	cytochrome P450 [Source:VB External Description;Acc:AAEL006989]	down	2.56003	0.00292518	0.00118951		up	2.01082	0.0011342	0.000107713
CUST_1464_PI424980000	AAEL002725-RA	conserved hypothetical protein [Source:VB External Description;Acc:AAEL002725]	down	2.52609	0.000333134	5.22144e-05		up	22.5648	0.000986634	8.30722e-05
CUST_11913_PI424980000	AAEL013113-RA	metallo-beta-lactamase, putative [Source:VB External Description;Acc:AAEL013113]	down	2.03065	0.00332144	0.00140243		up	2.78587	0.00130443	0.000138412
CUST_7027_PI424980000	AAEL011597-RC	conserved hypothetical protein [Source:VB External Description;Acc:AAEL011597]	down	6.11337	0.00122917	0.000375214		up	2.71733	0.007451	0.00205759
CUST_3267_PI424980000	AAEL005637-RA	vegetatible incompatibility protein HET-E-1, putative [Source:VB External Description;Acc:AAEL005637]	up	4.50474	9.47984e-05	5.38632e-06		down	2.13625	0.00780682	0.00220842
CUST_12938_PI424980000	AAEL007283-RA	acetyl-coa synthetase [Source:VB External Description;Acc:AAEL007283]	up	3.47355	0.000546275	0.00011423		down	2.11569	0.0026271	0.00043214
CUST_7057_PI424980000	AAEL012779-RA	protease m1 zinc metalloprotease [Source:VB External Description;Acc:AAEL012779]	up	3.30225	0.000171083	1.56301e-05		down	3.17873	0.000678462	3.86056e-05
CUST_5209_PI424980000	AAEL000105-RA	beta-alanine synthase, putative [Source:VB External Description;Acc:AAEL000105]	up	2.47123	0.00377499	0.00165005		down	2.5276	0.00672957	0.00177999
CUST_2203_PI424980000	AAEL009298-RA	2-Keto-3-deoxy-(6-phospho-)gluconate aldolase, putative [Source:VB External Description;Acc:AAEL009298]	up	3.50948	0.000359815	5.92227e-05		down	3.06516	0.000417016	1.27392e-05
CUST_13397_PI424980000	AAEL000385-RB	developmentally regulated RNA-binding protein [Source:VB External Description;Acc:AAEL000385]	up	4.78299	0.00018928	1.93283e-05		down	2.65357	0.00145202	0.000167799
CUST_565_PI424980000	AAEL005772-RA	odorant-binding protein 99c, putative [Source:VB External Description;Acc:AAEL005772]	up	2.98582	0.000324084	5.04826e-05		down	2.07263	0.001248	0.000128401
CUST_5009_PI424980000	AAEL006169-RA	Lysosomal aspartic protease Precursor (EC 3.4.23.-) [Source:VB External Description;Acc:AAEL006169]	up	2.54223	0.000394233	6.90324e-05		down	3.16268	0.000496318	2.07213e-05
CUST_3579_PI424980000	AAEL008212-RA	serine collagenase 1 precursor, putative [Source:VB External Description;Acc:AAEL008212]	up	2.36137	0.000370556	6.27739e-05		down	7.9375	0.000115625	4.03071e-07
CUST_8820_PI424980000	AAEL003990-RA	myeloid leukemia factor, [Source:VB External Description;Acc:AAEL003990]	up	2.26546	0.00119424	0.000360454		down	2.09101	0.000731895	4.35124e-05
CUST_13396_PI424980000	AAEL000385-RA	developmentally regulated RNA-binding protein [Source:VB External Description;Acc:AAEL000385]	up	4.65269	0.000259142	3.42913e-05		down	2.49824	0.00163441	0.000202111
CUST_8822_PI424980000	AAEL003990-RC	myeloid leukemia factor, [Source:VB External Description;Acc:AAEL003990]	up	2.22712	0.00114263	0.0003383		down	2.03153	0.000446509	1.64593e-05
CUST_6814_PI424980000	AAEL005620-RA	conserved hypothetical protein [Source:VB External Description;Acc:AAEL005620]	up	2.07823	0.000616468	0.000137448		down	3.89421	0.000164004	8.68964e-07
CUST_13772_PI424980000	AAEL007226-RA	nidogen [Source:VB External Description;Acc:AAEL007226]	up	2.69999	0.00177745	0.000612819		down	3.05749	0.000772844	4.88665e-05
CUST_4176_PI424980000	AAEL004239-RA	conserved hypothetical protein [Source:VB External Description;Acc:AAEL004239]	up	3.45107	2.30262e-05	1.17018e-07		down	2.06197	0.00122632	0.000125289
CUST_14146_PI424980000	AAEL015555-RA	conserved hypothetical protein [Source:VB External Description;Acc:AAEL015555]	up	2.72978	6.45636e-05	2.35127e-06		down	2.12035	0.00382425	0.000761787
CUST_7157_PI424980000	AAEL001499-RA	conserved hypothetical protein [Source:VB External Description;Acc:AAEL001499]	up	2.31741	0.00875484	0.00461388		down	3.63688	0.000429435	1.4353e-05
CUST_227_PI424980000	AAEL003201-RA	carboxy/choline esterase Alpha esterase	down	3.44033	0.000212618	2.43065e-05		down	8.34892	0.00013776	5.23373e-07
CUST_11229_PI424980000	AAEL002880-RA	conserved hypothetical protein [Source:VB External Description;Acc:AAEL002880]	down	2.00446	0.00208461	0.000762532		down	2.31842	0.00848805	0.0024848
CUST_1919_PI424980000	AAEL009658-RC	alpha,alpha-trehalase [Source:VB External Description;Acc:AAEL009658]	down	2.01034	0.00160955	0.000535091		down	2.417	0.000266906	4.70224e-06
CUST_10008_PI424980000	AAEL011547-RA	metalloproteinase, putative [Source:VB External Description;Acc:AAEL011547]	down	2.0113	0.000735594	0.000182943		down	4.86739	0.00017414	1.10423e-06
CUST_1701_PI424980000	AAEL010557-RA	hypothetical protein [Source:VB External Description;Acc:AAEL010557]	down	2.0193	0.00337423	0.00143084		down	2.49784	0.00590908	0.00146744
CUST_12931_PI424980000	AAEL012569-RA	hypothetical protein [Source:VB External Description;Acc:AAEL012569]	down	2.02403	0.00119444	0.000360858		down	2.10721	0.000701268	4.05395e-05
CUST_1917_PI424980000	AAEL009658-RA	alpha,alpha-trehalase [Source:VB External Description;Acc:AAEL009658]	down	2.03121	0.0012059	0.000366067		down	2.3898	0.000196508	1.91685e-06
CUST_4123_PI424980000	AAEL001764-RA	histone-fold protein CHRAC subunit, putative [Source:VB External Description;Acc:AAEL001764]	down	2.03765	0.000608765	0.000134774		down	3.77664	0.000509003	2.18988e-05
CUST_453_PI424980000	AAEL003497-RA	farnesyl-pyrophosphate synthetase [Source:VB External Description;Acc:AAEL003497]	down	2.04502	0.00193593	0.000688982		down	3.45408	0.00143896	0.000164891
CUST_5085_PI424980000	AAEL001119-RA	DNA-binding protein Ewg, putative [Source:VB External Description;Acc:AAEL001119]	down	2.0457	0.00197256	0.000707736		down	2.17591	0.00136305	0.000150608
CUST_5809_PI424980000	AAEL005366-RA	hypothetical protein [Source:VB External Description;Acc:AAEL005366]	down	2.04907	0.000659204	0.000154066		down	2.04363	0.000651166	3.51692e-05
CUST_4243_PI424980000	AAEL007416-RA	cysteine dioxygenase [Source:VB External Description;Acc:AAEL007416]	down	2.05888	0.00243602	0.00093702		down	2.9936	0.00164392	0.00020426
CUST_11623_PI424980000	AAEL003117-RA	peroxisomal targeting signal 2 receptor [Source:VB External Description;Acc:AAEL003117]	down	2.06723	0.000266249	3.59533e-05		down	2.18817	0.00423434	0.000893864
CUST_1109_PI424980000	AAEL007926-RA	retinoid-inducible serine carboxypeptidase (serine carboxypeptidase [Source:VB External Description;Acc:AAEL007926]	down	2.06973	9.73103e-05	5.8029e-06		down	2.26089	0.00142406	0.000162746
CUST_2152_PI424980000	AAEL004090-RA	conserved hypothetical protein [Source:VB External Description;Acc:AAEL004090]	down	2.0722	0.000649311	0.000149793		down	2.41786	0.00135821	0.000149034
CUST_1956_PI424980000	AAEL012478-RA	glucose transporter, putative [Source:VB External Description;Acc:AAEL012478]	down	2.07374	8.94198e-05	4.86194e-06		down	2.59191	0.000254553	3.41728e-06
CUST_3050_PI424980000	AAEL010326-RA	Phosphotriesterase-related protein (EC 3.1.-.-)(Parathion hydrolase-related protein) [Source:VB External Description;Acc:AAEL010326]	down	2.08636	0.00187389	0.00065875		down	4.64581	0.000102949	2.283e-07
CUST_5391_PI424980000	AAEL005447-RA	hypothetical protein [Source:VB External Description;Acc:AAEL005447]	down	2.08756	0.00699233	0.00351856		down	2.68063	0.000876582	6.30268e-05
CUST_12289_PI424980000	AAEL007843-RA	symbol, putative [Source:VB External Description;Acc:AAEL007843]	down	2.10033	0.000118348	8.12941e-06		down	2.13009	0.00105801	9.46219e-05
CUST_5023_PI424980000	AAEL003810-RA	sugar transporter [Source:VB External Description;Acc:AAEL003810]	down	2.10304	0.000661644	0.000155297		down	2.10443	0.00023242	2.93586e-06
CUST_211_PI424980000	AAEL002391-RA	no description available	down	2.10948	0.00189646	0.000669203		down	3.46535	0.00313232	0.000563167
CUST_12655_PI424980000	AAEL015573-RA	glycoside hydrolases [Source:VB External Description;Acc:AAEL015573]	down	2.12191	0.000700966	0.000169503		down	3.20167	0.00148832	0.000175438
CUST_1997_PI424980000	AAEL012560-RA	serine collagenase 1 precursor, putative [Source:VB External Description;Acc:AAEL012560]	down	2.12962	0.000407599	7.23581e-05		down	3.08803	0.000195289	1.80871e-06
CUST_14014_PI424980000	AAEL003570-RA	conserved hypothetical protein [Source:VB External Description;Acc:AAEL003570]	down	2.15681	0.0022763	0.000852478		down	2.1844	0.00268	0.000446297
CUST_418_PI424980000	AAEL010764-RA	aldehyde dehydrogenase [Source:VB External Description;Acc:AAEL010764]	down	2.16454	0.000472862	9.18295e-05		down	5.7119	0.000995912	8.5285e-05
CUST_7908_PI424980000	AAEL005672-RA	adenosine deaminase [Source:VB External Description;Acc:AAEL005672]	down	2.18172	0.000620362	0.000138841		down	2.5939	0.00479357	0.00106857
CUST_13464_PI424980000	AAEL008858-RA	deoxyribonuclease I, putative [Source:VB External Description;Acc:AAEL008858]	down	2.18357	0.000285404	3.99521e-05		down	2.56177	0.000352813	8.33216e-06
CUST_13521_PI424980000	AAEL009782-RA	brain chitinase and chia [Source:VB External Description;Acc:AAEL009782]	down	2.18957	1.23588e-05	2.63971e-08		down	2.42235	0.000382154	1.00185e-05
CUST_8514_PI424980000	AAEL002161-RA	UPF0184 protein AAEL002161 [Source:VB External Description;Acc:AAEL002161]	down	2.195	0.000152289	1.26064e-05		down	4.75425	0.000496318	2.06431e-05
CUST_12870_PI424980000	AAEL010292-RA	conserved hypothetical protein [Source:VB External Description;Acc:AAEL010292]	down	2.20514	0.000698143	0.000168651		down	2.01674	0.00499513	0.00115608
CUST_2408_PI424980000	AAEL004701-RA	Argininosuccinate synthase (EC 6.3.4.5)(Citrulline--aspartate ligase) [Source:VB External Description;Acc:AAEL004701]	down	2.21311	0.000391348	6.82908e-05		down	2.95078	0.000519294	2.2722e-05
CUST_5645_PI424980000	AAEL009431-RA	mitochondrial ribosomal protein, L10, putative [Source:VB External Description;Acc:AAEL009431]	down	2.21854	0.000163473	1.42105e-05		down	2.08454	0.000318049	6.43348e-06
CUST_8025_PI424980000	AAEL003897-RA	DNA repair protein xp-c / rad4 [Source:VB External Description;Acc:AAEL003897]	down	2.22448	0.000595397	0.000130069		down	2.34737	0.00384727	0.000768566
CUST_3131_PI424980000	AAEL011901-RA	1-acyl-sn-glycerol-3-phosphate acyltransferase [Source:VB External Description;Acc:AAEL011901]	down	2.22497	0.000383051	6.62412e-05		down	6.48901	0.000417016	1.27984e-05
CUST_1916_PI424980000	AAEL012339-RB	cdk1 [Source:VB External Description;Acc:AAEL012339]	down	2.24848	0.000867415	0.000230717		down	5.88994	0.000262449	3.8536e-06
CUST_8464_PI424980000	AAEL002895-RA	conserved hypothetical protein [Source:VB External Description;Acc:AAEL002895]	down	2.26057	0.00634496	0.00312609		down	2.30935	0.00755734	0.0021037
CUST_1708_PI424980000	AAEL003186-RA	hypothetical protein [Source:VB External Description;Acc:AAEL003186]	down	2.26549	0.000576007	0.000123694		down	3.87919	0.00533986	0.00127319
CUST_202_PI424980000	AAEL003198-RA	carboxy/choline esterase Alpha esterase CCEAE6C	down	2.26852	0.000193411	2.0054e-05		down	3.67784	0.000318339	6.65327e-06
CUST_1915_PI424980000	AAEL012339-RA	cdk1 [Source:VB External Description;Acc:AAEL012339]	down	2.26916	0.000946396	0.000262305		down	7.51912	0.000529548	2.34352e-05
CUST_10394_PI424980000	AAEL012153-RA	conserved hypothetical protein [Source:VB External Description;Acc:AAEL012153]	down	2.30751	0.000106652	6.68911e-06		down	2.0785	0.000423359	1.32988e-05
CUST_2275_PI424980000	AAEL012272-RA	fk506 binding protein [Source:VB External Description;Acc:AAEL012272]	down	2.30915	6.43445e-05	2.31585e-06		down	2.58153	0.000754217	4.60786e-05
CUST_197_PI424980000	AAEL003196-RA	carboxy/choline esterase Alpha esterase CCEAE2C	down	2.32251	0.000205288	2.22777e-05		down	3.41002	0.000467176	1.84203e-05
CUST_4934_PI424980000	AAEL001563-RA	conserved hypothetical protein [Source:VB External Description;Acc:AAEL001563]	down	2.33674	0.000611951	0.000135997		down	2.09013	0.00104221	9.25669e-05
CUST_5978_PI424980000	AAEL009925-RA	amidase [Source:VB External Description;Acc:AAEL009925]	down	2.3555	5.28226e-05	1.20949e-06		down	2.97332	0.000254553	3.4546e-06
CUST_3039_PI424980000	AAEL001047-RA	adenylate cyclase [Source:VB External Description;Acc:AAEL001047]	down	2.35956	0.000111213	7.38887e-06		down	2.62015	0.000633017	3.3271e-05
CUST_12148_PI424980000	AAEL015021-RA	glycoside hydrolases [Source:VB External Description;Acc:AAEL015021]	down	2.35961	5.47151e-05	1.39378e-06		down	2.01552	0.000429435	1.43168e-05
CUST_10056_PI424980000	AAEL014136-RA	conserved hypothetical protein [Source:VB External Description;Acc:AAEL014136]	down	2.36495	0.000667874	0.000157707		down	2.71006	0.000898405	6.59574e-05
CUST_5607_PI424980000	AAEL003890-RA	cytochrome P450 [Source:VB External Description;Acc:AAEL003890]	down	2.36776	0.000124578	8.86834e-06		down	9.38838	0.000769695	4.81306e-05
CUST_2347_PI424980000	AAEL014361-RA	amidase [Source:VB External Description;Acc:AAEL014361]	down	2.3742	2.31606e-05	1.4834e-07		down	2.89048	0.000196623	2.04081e-06
CUST_12140_PI424980000	AAEL002038-RA	protein serine/threonine kinase, putative [Source:VB External Description;Acc:AAEL002038]	down	2.38206	0.00790423	0.0040899		down	2.75314	0.0041994	0.000880498
CUST_8442_PI424980000	AAEL010314-RA	F-box/lrr protein fragment [Source:VB External Description;Acc:AAEL010314]	down	2.39002	6.47084e-05	2.42289e-06		down	2.54362	0.000669923	3.71933e-05
CUST_10905_PI424980000	AAEL014920-RA	lipase 1 precursor [Source:VB External Description;Acc:AAEL014920]	down	2.39093	0.00453364	0.00205781		down	2.4738	0.00205101	0.000289362
CUST_9292_PI424980000	AAEL003349-RA	NADPH cytochrome P450 [Source:VB External Description;Acc:AAEL003349]	down	2.40328	0.000534438	0.000110634		down	2.84904	0.00147555	0.000172267
CUST_3898_PI424980000	AAEL007074-RA	hypothetical protein [Source:VB External Description;Acc:AAEL007074]	down	2.42599	0.00029949	4.36116e-05		down	3.13619	0.000430425	1.45847e-05
CUST_271_PI424980000	AAEL010801-RB	conserved hypothetical protein [Source:VB External Description;Acc:AAEL010801]	down	2.4266	0.00221284	0.000822828		down	2.77379	0.00883924	0.00261846
CUST_7358_PI424980000	AAEL013815-RA	conserved hypothetical protein [Source:VB External Description;Acc:AAEL013815]	down	2.43234	0.00194673	0.000696352		down	4.22107	0.00168626	0.000213824
CUST_199_PI424980000	AAEL003181-RA	carboxy/choline esterase Alpha esterase CCEAE3C	down	2.46063	0.00013047	9.60199e-06		down	3.03523	0.00135821	0.000149192
CUST_270_PI424980000	AAEL010801-RA	conserved hypothetical protein [Source:VB External Description;Acc:AAEL010801]	down	2.46814	0.00260017	0.00101745		down	2.71455	0.00899514	0.00267758
CUST_2276_PI424980000	AAEL012272-RB	fk506 binding protein [Source:VB External Description;Acc:AAEL012272]	down	2.47488	5.3882e-05	1.26322e-06		down	2.46116	0.0018168	0.000239344
CUST_6493_PI424980000	AAEL001959-RA	conserved hypothetical protein [Source:VB External Description;Acc:AAEL001959]	down	2.47488	0.000146913	1.16643e-05		down	2.40824	0.000429435	1.44188e-05
CUST_10039_PI424980000	AAEL000845-RA	protein-tyrosine phosphatase [Source:VB External Description;Acc:AAEL000845]	down	2.47901	0.000823757	0.000214824		down	2.40873	0.00343022	0.000648557
CUST_9201_PI424980000	AAEL000610-RA	hypothetical protein [Source:VB External Description;Acc:AAEL000610]	down	2.4844	0.000104721	6.53006e-06		down	2.86127	0.000467176	1.77928e-05
CUST_3436_PI424980000	AAEL003789-RA	exportin, putative [Source:VB External Description;Acc:AAEL003789]	down	2.51236	0.00018256	1.80685e-05		down	2.84858	0.000350435	8.06011e-06
CUST_593_PI424980000	AAEL009420-RA	ClassB Scavenger Receptor (CD36 domain). [Source:VB External Description;Acc:AAEL009420]	down	2.51268	0.000207041	2.30765e-05		down	2.71214	0.000115625	3.96397e-07
CUST_10936_PI424980000	AAEL010392-RA	hypothetical protein [Source:VB External Description;Acc:AAEL010392]	down	2.51892	2.66004e-05	2.31448e-07		down	2.25967	0.000752399	4.54961e-05
CUST_3192_PI424980000	AAEL001095-RA	hypothetical protein [Source:VB External Description;Acc:AAEL001095]	down	2.52161	0.00715942	0.0036234		down	3.29862	0.000917293	6.99529e-05
CUST_590_PI424980000	AAEL000227-RA	ClassB Scavenger Receptor (CD36 domain). [Source:VB External Description;Acc:AAEL000227]	down	2.54108	0.00050082	0.000100322		down	2.11335	0.000964338	7.84224e-05
CUST_2872_PI424980000	AAEL000132-RA	AMP dependent coa ligase [Source:VB External Description;Acc:AAEL000132]	down	2.54745	0.000560227	0.000119019		down	3.58258	0.00401328	0.000821695
CUST_3815_PI424980000	AAEL009463-RA	hypothetical protein [Source:VB External Description;Acc:AAEL009463]	down	2.56325	0.000370349	6.22545e-05		down	2.53442	0.00143036	0.000163613
CUST_12200_PI424980000	AAEL010348-RA	sugar transporter [Source:VB External Description;Acc:AAEL010348]	down	2.5845	0.00309219	0.00127462		down	2.06903	0.00349158	0.000668038
CUST_3162_PI424980000	AAEL008025-RA	conserved hypothetical protein [Source:VB External Description;Acc:AAEL008025]	down	2.58502	3.66994e-05	4.83412e-07		down	2.05383	7.85784e-05	7.26158e-08
CUST_10461_PI424980000	AAEL009164-RA	tRNA delta(2)-isopentenylpyrophosphate transferase [Source:VB External Description;Acc:AAEL009164]	down	2.59706	0.000769922	0.000194674		down	2.22865	0.00166903	0.00020931
CUST_6163_PI424980000	AAEL015391-RA	gamma glutamyl transpeptidases [Source:VB External Description;Acc:AAEL015391]	down	2.60693	0.000698055	0.000168476		down	3.84934	0.000291116	5.58977e-06
CUST_12643_PI424980000	AAEL008708-RA	lysosomal pro-X carboxypeptidase, putative [Source:VB External Description;Acc:AAEL008708]	down	2.61868	2.56732e-05	2.04765e-07		down	2.52944	0.0029211	0.000505996
CUST_12457_PI424980000	AAEL014689-RA	NADPH cytochrome P450 [Source:VB External Description;Acc:AAEL014689]	down	2.61918	0.00081531	0.000210921		down	2.25419	0.00875184	0.00258179
CUST_5586_PI424980000	AAEL002024-RA	protein serine/threonine kinase, putative [Source:VB External Description;Acc:AAEL002024]	down	2.62502	0.00041468	7.48489e-05		down	2.28163	0.0011654	0.000113799
CUST_8684_PI424980000	AAEL010620-RA	conserved hypothetical protein [Source:VB External Description;Acc:AAEL010620]	down	2.64252	0.000207345	2.32277e-05		down	2.95125	0.00243672	0.000383539
CUST_3750_PI424980000	AAEL014663-RA	AMP dependent coa ligase [Source:VB External Description;Acc:AAEL014663]	down	2.64812	0.0012586	0.000386405		down	3.08617	0.000636746	3.37898e-05
CUST_13111_PI424980000	AAEL011483-RA	odorant-binding protein 50c, putative [Source:VB External Description;Acc:AAEL011483]	down	2.65114	8.42559e-05	4.24889e-06		down	5.01113	0.00017414	1.20607e-06
CUST_10721_PI424980000	AAEL007062-RA	hypothetical protein [Source:VB External Description;Acc:AAEL007062]	down	2.65894	0.000250789	3.22162e-05		down	2.20268	0.000411922	1.22659e-05
CUST_13162_PI424980000	AAEL001307-RA	SEC14, putative [Source:VB External Description;Acc:AAEL001307]	down	2.65953	0.000185606	1.87312e-05		down	3.5929	0.00127111	0.000132185
CUST_2371_PI424980000	AAEL011079-RA	C-Type lectin (CTL) - mannose binding. [Source:VB External Description;Acc:AAEL011079]	down	2.66841	4.45442e-05	8.23597e-07		down	3.52739	0.000266906	4.51084e-06
CUST_7743_PI424980000	AAEL012557-RA	serine collagenase 1 precursor, putative [Source:VB External Description;Acc:AAEL012557]	down	2.69605	0.00776893	0.00399867		down	11.9527	7.85784e-05	2.704e-08
CUST_10322_PI424980000	AAEL015315-RA	malate synthase [Source:VB External Description;Acc:AAEL015315]	down	2.70118	0.000170301	1.54794e-05		down	2.1272	0.00536502	0.0012819
CUST_5900_PI424980000	AAEL011398-RA	hypothetical protein [Source:VB External Description;Acc:AAEL011398]	down	2.722	0.00111581	0.000327125		down	2.01996	0.00374723	0.000738749
CUST_429_PI424980000	AAEL008963-RA	tyrosine aminotransferase [Source:VB External Description;Acc:AAEL008963]	down	2.73915	5.62025e-05	1.60287e-06		down	2.28776	0.00342098	0.000644221
CUST_9412_PI424980000	AAEL001987-RA	protein serine/threonine kinase, putative [Source:VB External Description;Acc:AAEL001987]	down	2.74806	0.000682047	0.000163197		down	3.9818	0.00124493	0.000127829
CUST_3029_PI424980000	AAEL011112-RC	alcohol dehydrogenase [Source:VB External Description;Acc:AAEL011112]	down	2.77593	0.000542155	0.000113008		down	3.45139	0.000405887	1.18361e-05
CUST_3028_PI424980000	AAEL011112-RB	alcohol dehydrogenase [Source:VB External Description;Acc:AAEL011112]	down	2.7778	0.000750082	0.000187815		down	3.43768	0.000674497	3.77782e-05
CUST_5660_PI424980000	AAEL008738-RA	DEAD box ATP-dependent RNA helicase [Source:VB External Description;Acc:AAEL008738]	down	2.78336	0.000487441	9.60744e-05		down	3.51674	0.000527498	2.32903e-05
CUST_13602_PI424980000	AAEL013837-RA	conserved hypothetical protein [Source:VB External Description;Acc:AAEL013837]	down	2.78608	9.80003e-05	5.89778e-06		down	5.23638	0.000379415	9.54479e-06
CUST_3862_PI424980000	AAEL010576-RL	modifier of mdg4 [Source:VB External Description;Acc:AAEL010576]	down	2.7965	0.00107471	0.000311057		down	4.53038	0.00321692	0.000586966
CUST_3027_PI424980000	AAEL011112-RA	alcohol dehydrogenase [Source:VB External Description;Acc:AAEL011112]	down	2.82153	0.000568417	0.000121403		down	3.77711	0.000701384	4.12663e-05
CUST_497_PI424980000	AAEL004451-RA	organic cation transporter [Source:VB External Description;Acc:AAEL004451]	down	2.86939	0.000253277	3.275e-05		down	2.35955	0.00617355	0.001567
CUST_7683_PI424980000	AAEL006372-RA	sulphate transporter [Source:VB External Description;Acc:AAEL006372]	down	2.8746	0.000333134	5.22132e-05		down	2.97778	0.000837195	5.71655e-05
CUST_63_PI424980000	AAEL015654-RA	cytochrome P450 [Source:VB External Description;Acc:AAEL015654]	down	2.88382	0.000484925	9.51445e-05		down	9.0952	0.00017414	1.32145e-06
CUST_4199_PI424980000	AAEL007051-RA	lipase [Source:VB External Description;Acc:AAEL007051]	down	2.89511	0.000706676	0.000171652		down	6.66101	0.000553393	2.51476e-05
CUST_14042_PI424980000	AAEL009243-RA	glycoside hydrolases [Source:VB External Description;Acc:AAEL009243]	down	2.91607	7.4041e-05	3.43586e-06		down	2.21666	0.000843985	5.79757e-05
CUST_710_PI424980000	AAEL015144-RA	conserved hypothetical protein [Source:VB External Description;Acc:AAEL015144]	down	2.93237	0.003351	0.00141856		down	8.48344	0.000467176	1.79245e-05
CUST_7929_PI424980000	AAEL008604-RA	zinc carboxypeptidase [Source:VB External Description;Acc:AAEL008604]	down	2.94046	0.00025681	3.35895e-05		down	4.59021	7.85784e-05	5.88106e-08
CUST_779_PI424980000	AAEL013430-RA	hypothetical protein [Source:VB External Description;Acc:AAEL013430]	down	2.94048	0.00156388	0.000514805		down	2.52824	0.00249167	0.000398109
CUST_13692_PI424980000	AAEL009330-RA	carbonic anhydrase II, putative [Source:VB External Description;Acc:AAEL009330]	down	2.95029	0.00577835	0.0027778		down	2.52126	0.00481823	0.00108014
CUST_1772_PI424980000	AAEL001999-RA	protein serine/threonine kinase, putative [Source:VB External Description;Acc:AAEL001999]	down	2.96173	0.000582303	0.000125749		down	2.09634	0.00107629	9.73623e-05
CUST_3254_PI424980000	AAEL011575-RA	conserved hypothetical protein [Source:VB External Description;Acc:AAEL011575]	down	2.9721	0.000317135	4.80668e-05		down	2.87526	0.00325503	0.000598933
CUST_4431_PI424980000	AAEL007607-RA	conserved hypothetical protein [Source:VB External Description;Acc:AAEL007607]	down	2.98771	0.000594422	0.000129667		down	2.40045	0.00115826	0.000112256
CUST_13135_PI424980000	AAEL002536-RA	E3 ubiquitin-protein ligase nedd-4 [Source:VB External Description;Acc:AAEL002536]	down	3.01663	0.00110057	0.000321307		down	2.16491	0.00826622	0.00239467
CUST_11230_PI424980000	AAEL014250-RA	insect replication protein a [Source:VB External Description;Acc:AAEL014250]	down	3.02192	0.00107971	0.000313017		down	3.55188	0.00228676	0.000349389
CUST_5820_PI424980000	AAEL010230-RA	NADH:ubiquinone dehydrogenase, putative [Source:VB External Description;Acc:AAEL010230]	down	3.07034	0.00194183	0.000692724		down	2.61044	0.00457192	0.000994283
CUST_9521_PI424980000	AAEL006342-RB	epoxide hydrolase [Source:VB External Description;Acc:AAEL006342]	down	3.07134	0.000157945	1.34946e-05		down	3.32972	0.00029399	5.67512e-06
CUST_329_PI424980000	AAEL002187-RA	conserved hypothetical protein [Source:VB External Description;Acc:AAEL002187]	down	3.07214	0.000427111	7.79381e-05		down	2.30761	0.00187969	0.000252645
CUST_514_PI424980000	AAEL013514-RA	pupal cuticle protein 78E, putative [Source:VB External Description;Acc:AAEL013514]	down	3.10851	0.00404856	0.00179164		down	3.20803	0.00135534	0.000148411
CUST_13442_PI424980000	AAEL003333-RA	hypothetical protein [Source:VB External Description;Acc:AAEL003333]	down	3.12312	0.000541696	0.000112791		down	3.38997	0.00128361	0.000134832
CUST_12609_PI424980000	AAEL005786-RA	conserved hypothetical protein [Source:VB External Description;Acc:AAEL005786]	down	3.13571	0.000505997	0.000101689		down	2.93541	0.00153822	0.0001855
CUST_7981_PI424980000	AAEL004350-RA	janus A, putative [Source:VB External Description;Acc:AAEL004350]	down	3.16097	0.000237623	2.91752e-05		down	3.42688	0.000375376	9.30216e-06
CUST_7116_PI424980000	AAEL004361-RA	alpha-glucosidase [Source:VB External Description;Acc:AAEL004361]	down	3.19783	0.000247705	3.14309e-05		down	4.89828	0.000212589	2.51926e-06
CUST_968_PI424980000	AAEL003610-RA	Clip-domain serine protease, family B. [Source:VB External Description;Acc:AAEL003610]	down	3.20367	0.000375363	6.43219e-05		down	5.69042	0.000352689	8.2568e-06
CUST_9520_PI424980000	AAEL006342-RA	epoxide hydrolase [Source:VB External Description;Acc:AAEL006342]	down	3.20873	0.000209675	2.36269e-05		down	3.36647	0.000656675	3.57365e-05
CUST_8498_PI424980000	AAEL001020-RA	anterior fat body protein [Source:VB External Description;Acc:AAEL001020]	down	3.21284	0.00031347	4.72004e-05		down	2.2032	0.00149762	0.000176688
CUST_481_PI424980000	AAEL002015-RA	protein serine/threonine kinase, putative [Source:VB External Description;Acc:AAEL002015]	down	3.22075	0.000292645	4.18013e-05		down	2.66872	0.000522409	2.3012e-05
CUST_9522_PI424980000	AAEL006342-RC	epoxide hydrolase [Source:VB External Description;Acc:AAEL006342]	down	3.246	0.000160348	1.3758e-05		down	3.56281	0.00229885	0.000351945
CUST_1214_PI424980000	AAEL006327-RA	sulfotransferase (sult) [Source:VB External Description;Acc:AAEL006327]	down	3.27592	7.54647e-05	3.57488e-06		down	4.1319	0.000610203	3.0899e-05
CUST_12495_PI424980000	AAEL004247-RA	Sialin, Sodium/sialic acid cotransporter, putative [Source:VB External Description;Acc:AAEL004247]	down	3.30615	0.000462276	8.84475e-05		down	2.56835	0.000957327	7.68718e-05
CUST_402_PI424980000	AAEL001069-RA	histone deacetylase [Source:VB External Description;Acc:AAEL001069]	down	3.38874	0.000118348	8.11915e-06		down	4.60824	0.00100429	8.72834e-05
CUST_3359_PI424980000	AAEL014209-RA	tangerin [Source:VB External Description;Acc:AAEL014209]	down	3.39271	8.67792e-05	4.64305e-06		down	3.18436	0.00148392	0.000174429
CUST_11574_PI424980000	AAEL005410-RA	erythroblast macrophage protein emp [Source:VB External Description;Acc:AAEL005410]	down	3.40383	0.000629731	0.000142406		down	3.14115	0.00152642	0.000182593
CUST_6879_PI424980000	AAEL003599-RA	conserved hypothetical protein [Source:VB External Description;Acc:AAEL003599]	down	3.42411	5.62025e-05	1.59292e-06		down	4.11601	0.000175815	1.49837e-06
CUST_1184_PI424980000	AAEL002950-RA	conserved hypothetical protein [Source:VB External Description;Acc:AAEL002950]	down	3.44665	0.000438056	8.08977e-05		down	2.16841	0.00374653	0.000738001
CUST_1711_PI424980000	AAEL004009-RA	glucose dehydrogenase [Source:VB External Description;Acc:AAEL004009]	down	3.46737	7.57728e-05	3.60779e-06		down	2.59644	0.00163441	0.000202224
CUST_11119_PI424980000	AAEL009335-RA	adhesion regulating molecule 1 (110 kda cell membrane glycoprotein) [Source:VB External Description;Acc:AAEL009335]	down	3.47946	0.00934248	0.00498567		down	13.3743	0.000164581	9.46356e-07
CUST_455_PI424980000	AAEL002176-RA	inosine-uridine preferring nucleoside hydrolase [Source:VB External Description;Acc:AAEL002176]	down	3.49208	0.000170301	1.55175e-05		down	2.81031	0.00407607	0.000842686
CUST_11682_PI424980000	AAEL003090-RA	malate synthase [Source:VB External Description;Acc:AAEL003090]	down	3.50045	0.000527497	0.000107731		down	2.25732	0.000889573	6.5035e-05
CUST_3975_PI424980000	AAEL011007-RA	fibrinogen and fibronectin [Source:VB External Description;Acc:AAEL011007]	down	3.5306	0.000747474	0.000186801		down	2.6543	0.00601573	0.00150656
CUST_6430_PI424980000	AAEL013462-RA	conserved hypothetical protein [Source:VB External Description;Acc:AAEL013462]	down	3.54342	0.00100903	0.000285333		down	2.39416	0.00368732	0.000718609
CUST_10834_PI424980000	AAEL015637-RA	serine carboxypeptidase, putative [Source:VB External Description;Acc:AAEL015637]	down	3.55269	0.000234003	2.85045e-05		down	6.2059	0.000244511	3.1634e-06
CUST_2445_PI424980000	AAEL002026-RA	protein serine/threonine kinase, putative [Source:VB External Description;Acc:AAEL002026]	down	3.57023	0.00327215	0.00137766		down	4.22364	0.000846093	5.82075e-05
CUST_261_PI424980000	AAEL007868-RA	ubiquinol-cytochrome c reductase complex 14 kd protein [Source:VB External Description;Acc:AAEL007868]	down	3.59488	0.000677777	0.000161684		down	4.53996	0.00088109	6.37205e-05
CUST_365_PI424980000	AAEL002909-RA	lysosomal acid lipase, putative [Source:VB External Description;Acc:AAEL002909]	down	3.62812	0.00876652	0.00462215		down	3.90828	0.00870758	0.00256337
CUST_14123_PI424980000	AAEL004409-RA	yellow protein, putative [Source:VB External Description;Acc:AAEL004409]	down	3.63001	0.00165273	0.000554439		down	2.80149	0.00393753	0.000796077
CUST_6504_PI424980000	AAEL013526-RA	conserved hypothetical protein [Source:VB External Description;Acc:AAEL013526]	down	3.66043	0.00051788	0.000105015		down	2.6492	0.00168388	0.000213187
CUST_111_PI424980000	AAEL001312-RA	cytochrome P450 [Source:VB External Description;Acc:AAEL001312]	down	3.68697	0.000129658	9.46385e-06		down	6.84719	0.000369777	8.88467e-06
CUST_3469_PI424980000	AAEL007874-RA	conserved hypothetical protein [Source:VB External Description;Acc:AAEL007874]	down	3.70008	2.30262e-05	1.20981e-07		down	2.71052	0.00017414	1.15293e-06
CUST_10739_PI424980000	AAEL003485-RA	adhesion regulating molecule 1 (110 kda cell membrane glycoprotein) [Source:VB External Description;Acc:AAEL003485]	down	3.70748	0.00434573	0.00195729		down	14.1507	0.000115625	4.18219e-07
CUST_1910_PI424980000	AAEL011129-RA	alcohol dehydrogenase [Source:VB External Description;Acc:AAEL011129]	down	3.71393	6.65454e-05	2.61474e-06		down	5.4068	0.00017414	1.23168e-06
CUST_424_PI424980000	AAEL011922-RA	serine-type enodpeptidase, [Source:VB External Description;Acc:AAEL011922]	down	3.78188	4.48719e-05	8.42209e-07		down	8.2213	0.000266906	4.20195e-06
CUST_3462_PI424980000	AAEL003922-RA	conserved hypothetical protein [Source:VB External Description;Acc:AAEL003922]	down	3.83458	0.000110565	7.25519e-06		down	2.45142	0.004588	0.000999664
CUST_3045_PI424980000	AAEL001263-RA	predicted protein [Source:VB External Description;Acc:AAEL001263]	down	3.911	0.000170301	1.55138e-05		down	2.43215	0.000954264	7.56435e-05
CUST_444_PI424980000	AAEL007060-RA	lipase [Source:VB External Description;Acc:AAEL007060]	down	3.91458	0.000204272	2.21182e-05		down	3.55846	0.00075579	4.64851e-05
CUST_5747_PI424980000	AAEL014916-RA	lipase 1 precursor [Source:VB External Description;Acc:AAEL014916]	down	3.93558	0.000192129	1.98161e-05		down	5.14691	0.000438305	1.58868e-05
CUST_3124_PI424980000	AAEL004070-RA	hypothetical protein [Source:VB External Description;Acc:AAEL004070]	down	3.95799	0.000123256	8.64954e-06		down	5.86218	0.000434982	1.53664e-05
CUST_10611_PI424980000	AAEL007052-RA	lipase [Source:VB External Description;Acc:AAEL007052]	down	3.99956	0.000226197	2.66516e-05		down	7.52634	0.000403887	1.15057e-05
CUST_9059_PI424980000	AAEL011213-RA	conserved hypothetical protein [Source:VB External Description;Acc:AAEL011213]	down	4.00359	6.49037e-05	2.45499e-06		down	2.8268	0.00263157	0.000433146
CUST_771_PI424980000	AAEL004292-RA	hypothetical protein [Source:VB External Description;Acc:AAEL004292]	down	4.07421	0.000609408	0.0001351		down	2.03692	0.00196956	0.000273219
CUST_4760_PI424980000	AAEL004884-RA	hemomucin [Source:VB External Description;Acc:AAEL004884]	down	4.10165	0.00081531	0.000210758		down	4.97043	0.00210422	0.000302269
CUST_1719_PI424980000	AAEL000153-RA	conserved hypothetical protein [Source:VB External Description;Acc:AAEL000153]	down	4.13451	0.00106579	0.000307437		down	15.0352	0.00225525	0.000339249
CUST_13278_PI424980000	AAEL011244-RA	surfeit locus protein [Source:VB External Description;Acc:AAEL011244]	down	4.19875	0.000578626	0.000124466		down	4.10111	0.00184447	0.000244502
CUST_9387_PI424980000	AAEL003231-RA	conserved hypothetical protein [Source:VB External Description;Acc:AAEL003231]	down	4.20117	0.000198891	2.07424e-05		down	2.05688	0.000980516	8.10469e-05
CUST_6265_PI424980000	AAEL002392-RA	conserved hypothetical protein [Source:VB External Description;Acc:AAEL002392]	down	4.20777	0.00082013	0.000213557		down	2.04961	0.00983579	0.00302477
CUST_9480_PI424980000	AAEL010177-RA	conserved hypothetical protein [Source:VB External Description;Acc:AAEL010177]	down	4.40055	0.000385584	6.69122e-05		down	5.61644	0.00299264	0.000522075
CUST_3801_PI424980000	AAEL011068-RA	conserved hypothetical protein [Source:VB External Description;Acc:AAEL011068]	down	4.49259	0.00728148	0.00369222		down	2.75677	0.00658551	0.00172566
CUST_787_PI424980000	AAEL011933-RA	hypothetical protein [Source:VB External Description;Acc:AAEL011933]	down	4.59677	0.000200533	2.1327e-05		down	5.59788	0.000139508	5.45478e-07
CUST_5335_PI424980000	AAEL001279-RB	merozoite surface protein, putative [Source:VB External Description;Acc:AAEL001279]	down	4.66687	0.000673145	0.000159846		down	3.86335	0.00971089	0.0029714
CUST_12195_PI424980000	AAEL009236-RA	glycoside hydrolases [Source:VB External Description;Acc:AAEL009236]	down	4.67993	0.000735333	0.000182789		down	2.59117	0.00153822	0.000185514
CUST_12524_PI424980000	AAEL011341-RA	apyrase, putative [Source:VB External Description;Acc:AAEL011341]	down	4.68537	0.00013503	1.01986e-05		down	2.39514	0.000323755	7.05929e-06
CUST_4272_PI424980000	AAEL013603-RA	short-chain dehydrogenase [Source:VB External Description;Acc:AAEL013603]	down	4.70497	9.91716e-05	6.02819e-06		down	2.47656	0.000681053	3.88814e-05
CUST_2213_PI424980000	AAEL009968-RA	hypothetical protein [Source:VB External Description;Acc:AAEL009968]	down	4.70728	9.57925e-05	5.54497e-06		down	2.47709	0.000977517	8.05983e-05
CUST_9712_PI424980000	AAEL007792-RA	conserved hypothetical protein [Source:VB External Description;Acc:AAEL007792]	down	4.79488	0.00105711	0.00030329		down	2.63097	0.00717119	0.0019454
CUST_8979_PI424980000	AAEL003834-RA	metalloproteinase, putative [Source:VB External Description;Acc:AAEL003834]	down	5.12133	6.89868e-05	2.89489e-06		down	2.82763	0.00171067	0.000219379
CUST_6582_PI424980000	AAEL000640-RA	alanine-glyoxylate aminotransferase [Source:VB External Description;Acc:AAEL000640]	down	5.1373	0.000661647	0.000155687		down	11.7137	0.000266906	4.60599e-06
CUST_9663_PI424980000	AAEL010802-RA	conserved hypothetical protein [Source:VB External Description;Acc:AAEL010802]	down	5.21513	0.000251056	3.22808e-05		down	2.4789	0.00802028	0.00229104
CUST_1723_PI424980000	AAEL009237-RA	glycoside hydrolases [Source:VB External Description;Acc:AAEL009237]	down	5.27595	9.53916e-05	5.49633e-06		down	2.6853	0.000513256	2.22926e-05
CUST_6583_PI424980000	AAEL000640-RB	alanine-glyoxylate aminotransferase [Source:VB External Description;Acc:AAEL000640]	down	5.28753	0.000249722	3.20187e-05		down	11.344	0.000490352	1.96866e-05
CUST_13121_PI424980000	AAEL005531-RA	venom allergen [Source:VB External Description;Acc:AAEL005531]	down	5.37179	0.00206066	0.000750305		down	2.3215	0.00624351	0.00159245
CUST_12374_PI424980000	AAEL008007-RA	conserved hypothetical protein [Source:VB External Description;Acc:AAEL008007]	down	5.37799	0.00021821	2.53788e-05		down	3.10553	0.000102949	2.78284e-07
CUST_5158_PI424980000	AAEL015020-RA	glycoside hydrolases [Source:VB External Description;Acc:AAEL015020]	down	5.38658	0.000136843	1.0414e-05		down	2.63901	0.000837195	5.70974e-05
CUST_443_PI424980000	AAEL005749-RA	lysosomal alpha-mannosidase (mannosidase alpha class 2b member 1) [Source:VB External Description;Acc:AAEL005749]	down	5.38902	2.30262e-05	1.44696e-07		down	7.28723	0.000164581	9.37603e-07
CUST_2305_PI424980000	AAEL007137-RA	conserved hypothetical protein [Source:VB External Description;Acc:AAEL007137]	down	5.52941	0.000220432	2.57768e-05		down	3.87128	0.000429435	1.39074e-05
CUST_3180_PI424980000	AAEL011803-RA	prohibitin, putative [Source:VB External Description;Acc:AAEL011803]	down	5.65512	5.95016e-05	1.81931e-06		down	2.04882	0.00286766	0.00049144
CUST_11099_PI424980000	AAEL003527-RA	conserved hypothetical protein [Source:VB External Description;Acc:AAEL003527]	down	5.78722	9.73103e-05	5.81566e-06		down	2.75873	0.00420625	0.000882616
CUST_3585_PI424980000	AAEL005781-RA	hypothetical protein [Source:VB External Description;Acc:AAEL005781]	down	5.95134	0.00160646	0.000533869		down	4.97232	0.000910182	6.82239e-05
CUST_4217_PI424980000	AAEL011335-RA	conserved hypothetical protein [Source:VB External Description;Acc:AAEL011335]	down	6.00255	9.84483e-05	5.96043e-06		down	3.82226	0.000467176	1.83748e-05
CUST_706_PI424980000	AAEL008939-RA	conserved hypothetical protein [Source:VB External Description;Acc:AAEL008939]	down	6.02145	0.000111213	7.39182e-06		down	6.03491	0.000154474	7.13761e-07
CUST_12764_PI424980000	AAEL014664-RA	AMP dependent coa ligase [Source:VB External Description;Acc:AAEL014664]	down	6.22979	0.00034803	5.64891e-05		down	4.98225	0.000434982	1.51509e-05
CUST_731_PI424980000	AAEL001306-RA	conserved hypothetical protein [Source:VB External Description;Acc:AAEL001306]	down	6.30058	9.36444e-05	5.26219e-06		down	3.89364	0.00320759	0.000584606
CUST_5938_PI424980000	AAEL014723-RA	26S protease regulatory subunit [Source:VB External Description;Acc:AAEL014723]	down	6.58257	2.30262e-05	1.27587e-07		down	6.92756	0.000917293	6.94168e-05
CUST_3847_PI424980000	AAEL007197-RA	amino acid transporter [Source:VB External Description;Acc:AAEL007197]	down	6.71308	2.92283e-05	2.76391e-07		down	2.80313	0.00135821	0.000149363
CUST_1014_PI424980000	AAEL011622-RA	serine protease, putative [Source:VB External Description;Acc:AAEL011622]	down	7.01589	2.92283e-05	2.94806e-07		down	4.81729	0.000326806	7.21019e-06
CUST_1421_PI424980000	AAEL008793-RA	conserved hypothetical protein [Source:VB External Description;Acc:AAEL008793]	down	7.02242	6.49037e-05	2.46281e-06		down	3.06686	0.00134521	0.000146137
CUST_11842_PI424980000	AAEL008978-RA	conserved hypothetical protein [Source:VB External Description;Acc:AAEL008978]	down	7.70043	0.000528232	0.000108072		down	5.09797	0.0096483	0.00294928
CUST_3344_PI424980000	AAEL008985-RA	conserved hypothetical protein [Source:VB External Description;Acc:AAEL008985]	down	7.72273	0.000473613	9.20326e-05		down	4.92179	0.00953401	0.00291042
CUST_101_PI424980000	AAEL006814-RA	cytochrome P450 [Source:VB External Description;Acc:AAEL006814]	down	7.92938	6.47084e-05	2.41786e-06		down	10.5197	0.000957327	7.72296e-05
CUST_159_PI424980000	AAEL014604-RA	cytochrome P450 [Source:VB External Description;Acc:AAEL014604]	down	8.00816	7.31186e-05	3.34004e-06		down	9.55181	0.000610203	3.11149e-05
CUST_1101_PI424980000	AAEL008040-RA	brain chitinase and chia [Source:VB External Description;Acc:AAEL008040]	down	8.03089	8.15e-06	8.41515e-09		down	2.49723	0.000294717	5.71944e-06
CUST_12218_PI424980000	AAEL006548-RA	hypothetical protein [Source:VB External Description;Acc:AAEL006548]	down	8.33626	2.92283e-05	2.79357e-07		down	3.02377	0.00166903	0.000209753
CUST_4989_PI424980000	AAEL002668-RA	AMP dependent ligase [Source:VB External Description;Acc:AAEL002668]	down	8.77136	4.71896e-05	9.63751e-07		down	3.43303	0.000754815	4.62383e-05
CUST_13881_PI424980000	AAEL001286-RA	predicted protein [Source:VB External Description;Acc:AAEL001286]	down	9.05841	4.5852e-05	8.89066e-07		down	5.11753	0.000659391	3.62906e-05
CUST_3812_PI424980000	AAEL012721-RA	conserved hypothetical protein [Source:VB External Description;Acc:AAEL012721]	down	9.19182	0.000174855	1.64184e-05		down	2.41432	0.00446633	0.000962918
CUST_179_PI424980000	AAEL007946-RA	glutathionetransferase [Source:VB External Description;Acc:AAEL007946]	down	11.6586	5.47151e-05	1.41724e-06		down	17.179	0.00121503	0.00012272
CUST_10806_PI424980000	AAEL012430-RA	AMP dependent ligase [Source:VB External Description;Acc:AAEL012430]	down	13.0777	0.000756433	0.000189958		down	4.19795	0.00718851	0.00195232
CUST_2655_PI424980000	AAEL012903-RA	sugar transporter [Source:VB External Description;Acc:AAEL012903]	down	13.9579	0.000185606	1.86303e-05		down	21.7968	0.000388506	1.03595e-05
CUST_9047_PI424980000	AAEL009483-RA	conserved hypothetical protein [Source:VB External Description;Acc:AAEL009483]	down	14.2988	0.000266249	3.57932e-05		down	6.13319	0.00153614	0.000184861
CUST_477_PI424980000	AAEL002003-RA	protein serine/threonine kinase, putative [Source:VB External Description;Acc:AAEL002003]	down	14.7727	2.97774e-05	3.32e-07		down	2.36647	0.00419148	0.000878408
CUST_748_PI424980000	AAEL003027-RA	conserved hypothetical protein [Source:VB External Description;Acc:AAEL003027]	down	14.8793	0.000122068	8.50234e-06		down	4.1348	0.00510424	0.00118953
CUST_12309_PI424980000	AAEL006091-RA	rab6 [Source:VB External Description;Acc:AAEL006091]	down	14.983	8.08318e-05	3.94635e-06		down	7.87179	0.00313232	0.000563025
CUST_6129_PI424980000	AAEL003029-RA	hypothetical protein [Source:VB External Description;Acc:AAEL003029]	down	15.3804	5.62025e-05	1.59081e-06		down	5.99128	0.00237755	0.000369364
CUST_3604_PI424980000	AAEL015022-RA	glycoside hydrolases [Source:VB External Description;Acc:AAEL015022]	down	16.0198	0.000139315	1.08294e-05		down	5.08213	0.000789234	5.13784e-05
CUST_7407_PI424980000	AAEL002018-RA	hypothetical protein [Source:VB External Description;Acc:AAEL002018]	down	16.3396	0.000101115	6.1952e-06		down	7.59407	0.000352813	8.32e-06
CUST_11200_PI424980000	AAEL014671-RA	protease S51 alpha-aspartyl dipeptidase [Source:VB External Description;Acc:AAEL014671]	down	49.7756	0.000141038	1.10103e-05		down	23.4052	0.00222845	0.000331785

## Sheet: Table S3b
			CucR vs CucU					CucR vs NO					CucR vs BB
ProbeName	SystematicName_curated _ Vectorbase link	Vectorbase Description	regulation	FCAbsolute	Corrected p-value	p-value		regulation	FCAbsolute	Corrected p-value	p-value		regulation	FCAbsolute	Corrected p-value	p-value
CUST_908_PI424980000	AAEL011230-RA	chymotrypsin, putative [Source:VB External Description;Acc:AAEL011230]	up	30.2073	0.00860195	0.000105913		up	87.1405	2.30262e-05	1.29972e-07		up	28.3653	0.000434982	1.48901e-05
CUST_460_PI424980000	AAEL011167-RA	cathepsin l [Source:VB External Description;Acc:AAEL011167]	up	13.2134	0.00846659	0.000100536		up	5.43696	0.000943158	0.000260893		up	17.4955	0.000102949	2.33085e-07
CUST_714_PI424980000	AAEL001418-RA	conserved hypothetical protein [Source:VB External Description;Acc:AAEL001418]	up	13.0022	0.0105927	0.000208361		up	26.2441	3.91445e-05	5.67229e-07		up	4.70311	0.000636746	3.37042e-05
CUST_1435_PI424980000	AAEL003076-RA	glucosyl/glucuronosyl transferases [Source:VB External Description;Acc:AAEL003076]	up	10.3848	0.00444702	1.42448e-06		up	13.6481	2.58062e-05	2.15529e-07		up	16.0943	7.85784e-05	5.62642e-08
CUST_4380_PI424980000	AAEL015657-RA	conserved hypothetical protein [Source:VB External Description;Acc:AAEL015657]	up	8.14072	0.0128237	0.000459256		up	14.536	0.000162818	1.40879e-05		up	13.5121	0.00145202	0.000167879
CUST_13794_PI424980000	AAEL013263-RA	high affinity copper transporter, putative [Source:VB External Description;Acc:AAEL013263]	up	6.73398	0.0112553	0.000305781		up	4.41498	0.00312428	0.00129388		up	9.73432	0.00228584	0.000348993
CUST_4066_PI424980000	AAEL014843-RA	heat shock protein [Source:VB External Description;Acc:AAEL014843]	up	5.8681	0.0112815	0.000308563		up	11.4998	2.32695e-05	1.66413e-07		up	6.20851	0.000263297	3.92282e-06
CUST_843_PI424980000	AAEL011175-RA	alkaline phosphatase [Source:VB External Description;Acc:AAEL011175]	up	5.69818	0.0191292	0.00145824		up	6.17759	6.53031e-05	2.52469e-06		up	12.774	0.000102949	2.39654e-07
CUST_8991_PI424980000	AAEL000813-RA	dimethylaniline monooxygenase [Source:VB External Description;Acc:AAEL000813]	up	5.38796	0.00860195	0.000105688		up	3.22796	0.000177055	1.69032e-05		up	2.53871	0.00149823	0.000176914
CUST_2629_PI424980000	AAEL015010-RA	acetyl-coa synthetase [Source:VB External Description;Acc:AAEL015010]	up	5.23394	0.00666947	2.39286e-05		up	7.11583	8.49164e-05	4.4331e-06		up	5.27427	7.85784e-05	4.14997e-08
CUST_850_PI424980000	AAEL015070-RA	alkaline phosphatase [Source:VB External Description;Acc:AAEL015070]	up	5.08556	0.0191798	0.00148469		up	5.07945	0.000205536	2.24538e-05		up	13.5021	0.000917293	6.96111e-05
CUST_5037_PI424980000	AAEL006820-RA	lipid storage droplets surface binding protein 2 (lsd2) [Source:VB External Description;Acc:AAEL006820]	up	4.77836	0.00444702	3.6143e-06		up	4.71691	2.50211e-05	1.96541e-07		up	4.02552	0.000416059	1.25963e-05
CUST_2070_PI424980000	AAEL001194-RA	fatty acid synthase [Source:VB External Description;Acc:AAEL001194]	up	4.14015	0.00841358	6.43962e-05		up	5.4742	4.48852e-05	8.62447e-07		up	3.23371	0.000254553	3.50243e-06
CUST_1149_PI424980000	AAEL011704-RA	heat shock protein [Source:VB External Description;Acc:AAEL011704]	up	4.13315	0.0119507	0.000378738		up	8.23451	5.57199e-05	1.47153e-06		up	2.19961	0.00137535	0.000153224
CUST_9855_PI424980000	AAEL007799-RA	regulator of chromosome condensation [Source:VB External Description;Acc:AAEL007799]	up	3.46408	0.00666947	2.34606e-05		up	3.73545	0.000178469	1.70813e-05		up	2.21456	0.000429435	1.41642e-05
CUST_9856_PI424980000	AAEL007799-RB	regulator of chromosome condensation [Source:VB External Description;Acc:AAEL007799]	up	3.45874	0.00666947	2.64208e-05		up	3.73827	0.000152289	1.25746e-05		up	2.2678	0.000751044	4.51907e-05
CUST_6963_PI424980000	AAEL003899-RA	sugar transporter [Source:VB External Description;Acc:AAEL003899]	up	3.28523	0.00846659	9.56521e-05		up	2.28471	0.00033504	5.31206e-05		up	6.46719	0.000434982	1.50543e-05
CUST_13879_PI424980000	AAEL006600-RD	juvenile hormone-inducible protein, putative [Source:VB External Description;Acc:AAEL006600]	up	3.25625	0.0191576	0.00146784		up	3.93575	0.00167168	0.000564633		up	4.73578	0.000930738	7.25362e-05
CUST_11629_PI424980000	AAEL012032-RA	hypothetical protein [Source:VB External Description;Acc:AAEL012032]	up	3.19031	0.00444702	3.34061e-06		up	2.91269	2.92283e-05	3.14221e-07		up	3.58234	0.00361946	0.000700402
CUST_5859_PI424980000	AAEL004455-RA	conserved hypothetical protein [Source:VB External Description;Acc:AAEL004455]	up	3.12406	0.0110233	0.000241007		up	3.61879	6.709e-05	2.74772e-06		up	2.15639	0.00132321	0.00014103
CUST_7628_PI424980000	AAEL008651-RA	conserved hypothetical protein [Source:VB External Description;Acc:AAEL008651]	up	3.12288	0.018581	0.00138238		up	3.44622	0.000676524	0.000161058		up	28.4419	0.000393545	1.08909e-05
CUST_499_PI424980000	AAEL008844-RA	calcium-binding protein, putative [Source:VB External Description;Acc:AAEL008844]	up	3.08015	0.00942987	0.000131118		up	2.40802	0.00106117	0.000305623		up	4.61782	0.00323442	0.000592729
CUST_13878_PI424980000	AAEL006600-RC	juvenile hormone-inducible protein, putative [Source:VB External Description;Acc:AAEL006600]	up	3.0689	0.014491	0.0006964		up	3.79373	0.00037393	6.40312e-05		up	4.45401	0.00017414	1.31631e-06
CUST_11686_PI424980000	AAEL007046-RA	mitochondrial brown fat uncoupling protein [Source:VB External Description;Acc:AAEL007046]	up	3.00253	0.0176059	0.00115548		up	2.47655	0.00219227	0.000813062		up	3.58393	0.00264704	0.000437052
CUST_8393_PI424980000	AAEL008723-RA	conserved hypothetical protein [Source:VB External Description;Acc:AAEL008723]	up	2.92239	0.0154135	0.000818669		up	4.36224	0.000192129	1.98282e-05		up	2.01115	0.00320712	0.000583959
CUST_4215_PI424980000	AAEL005045-RA	ATP-dependent bile acid permease [Source:VB External Description;Acc:AAEL005045]	up	2.88556	0.00977092	0.000168501		up	3.37536	9.28454e-05	5.20607e-06		up	2.60687	0.00054408	2.45252e-05
CUST_68_PI424980000	AAEL017539-RA	cytochrome P450 [Source:VB External Description;Acc:AAEL017539]	up	2.58583	0.00483007	7.81598e-06		up	4.3449	0.000183811	1.83034e-05		up	3.18626	0.00118377	0.000116853
CUST_3453_PI424980000	AAEL000520-RA	conserved hypothetical protein [Source:VB External Description;Acc:AAEL000520]	up	2.5778	0.0112815	0.000314025		up	5.77128	0.00011044	7.22034e-06		up	2.95138	0.000719309	4.26164e-05
CUST_3531_PI424980000	AAEL012185-RA	ribosome biogenesis regulatory protein [Source:VB External Description;Acc:AAEL012185]	up	2.57598	0.00824098	4.32342e-05		up	2.92532	6.45318e-05	2.33405e-06		up	2.77432	0.000380424	9.75589e-06
CUST_14131_PI424980000	AAEL010118-RA	kelch repeat protein [Source:VB External Description;Acc:AAEL010118]	up	2.56734	0.0146469	0.000718642		up	3.20444	2.65049e-05	2.27413e-07		up	2.03001	0.000771487	4.84012e-05
CUST_1568_PI424980000	AAEL012100-RA	conserved hypothetical protein [Source:VB External Description;Acc:AAEL012100]	up	2.43114	0.0138619	0.000584175		up	3.17689	8.31073e-05	4.1177e-06		up	3.11337	0.00114382	0.000108958
CUST_12636_PI424980000	AAEL013406-RA	venom allergen [Source:VB External Description;Acc:AAEL013406]	up	2.41709	0.017318	0.00109332		up	7.89948	5.39406e-05	1.27824e-06		up	4.23497	0.000610462	3.16545e-05
CUST_1204_PI424980000	AAEL005991-RA	tricarboxylate transport protein [Source:VB External Description;Acc:AAEL005991]	up	2.38252	0.0199981	0.00165938		up	2.20993	0.000917453	0.000250456		up	4.37426	0.000873987	6.24597e-05
CUST_3562_PI424980000	AAEL003654-RA	conserved hypothetical protein [Source:VB External Description;Acc:AAEL003654]	up	2.37815	0.0137925	0.000568534		up	3.41491	5.28226e-05	1.21284e-06		up	2.1883	0.00204294	0.000287174
CUST_81_PI424980000	AAEL009124-RA	cytochrome P450 [Source:VB External Description;Acc:AAEL009124]	up	2.33566	0.0160041	0.000892732		up	3.97718	1.63659e-05	4.94437e-08		up	4.39711	0.00084885	5.85038e-05
CUST_76_PI424980000	AAEL009127-RA	cytochrome P450 [Source:VB External Description;Acc:AAEL009127]	up	2.31876	0.00959874	0.000153444		up	3.81572	5.47151e-05	1.36143e-06		up	3.13289	0.000701384	4.11685e-05
CUST_3759_PI424980000	AAEL007271-RA	basic helix-loop-helix zip transcription factor [Source:VB External Description;Acc:AAEL007271]	up	2.30181	0.0101826	0.000186426		up	4.97068	0.000118348	8.09384e-06		up	4.10711	0.00141882	0.000161418
CUST_694_PI424980000	AAEL012866-RA	conserved hypothetical protein [Source:VB External Description;Acc:AAEL012866]	up	2.29333	0.019692	0.00160098		up	3.88044	8.08919e-06	5.44099e-09		up	4.37551	0.000380424	9.77398e-06
CUST_13857_PI424980000	AAEL008281-RA	conserved hypothetical protein [Source:VB External Description;Acc:AAEL008281]	up	2.28326	0.0148234	0.000745933		up	2.7307	0.000347474	5.62676e-05		up	3.37126	0.000783058	5.05642e-05
CUST_6746_PI424980000	AAEL003949-RA	conserved hypothetical protein [Source:VB External Description;Acc:AAEL003949]	up	2.25909	0.0151206	0.000773839		up	2.50363	0.000310151	4.59885e-05		up	2.54886	0.001683	0.000212903
CUST_2191_PI424980000	AAEL008124-RA	possible RNA methyltransferase, putative [Source:VB External Description;Acc:AAEL008124]	up	2.24827	0.0181001	0.00125848		up	2.92083	0.000812424	0.000209709		up	2.54533	0.000266906	4.3246e-06
CUST_2520_PI424980000	AAEL000300-RA	WD-repeat protein [Source:VB External Description;Acc:AAEL000300]	up	2.23622	0.0133294	0.000528038		up	2.71169	0.000233994	2.84752e-05		up	2.08551	0.000601219	3.01755e-05
CUST_5867_PI424980000	AAEL001412-RA	conserved hypothetical protein [Source:VB External Description;Acc:AAEL001412]	up	2.22004	0.0187465	0.00140097		up	2.99508	4.5852e-05	9.01645e-07		up	2.54909	0.000369819	8.92366e-06
CUST_9249_PI424980000	AAEL004526-RA	conserved hypothetical protein [Source:VB External Description;Acc:AAEL004526]	up	2.19553	0.0135046	0.000543653		up	2.58424	0.000121012	8.3941e-06		up	2.59362	0.000610203	3.12157e-05
CUST_14163_PI424980000	AAEL013946-RA	conserved hypothetical protein [Source:VB External Description;Acc:AAEL013946]	up	2.17288	0.0178207	0.00121921		up	3.87709	0.000163473	1.4438e-05		up	5.35438	0.00341885	0.000643119
CUST_9099_PI424980000	AAEL007383-RC	secreted ferritin G subunit precursor, putative [Source:VB External Description;Acc:AAEL007383]	up	2.12662	0.0160866	0.000923174		up	2.37242	0.000172357	1.58923e-05		up	2.34343	0.000812507	5.40614e-05
CUST_9100_PI424980000	AAEL007383-RD	secreted ferritin G subunit precursor, putative [Source:VB External Description;Acc:AAEL007383]	up	2.12545	0.0158949	0.000877228		up	2.41042	0.000126406	9.08901e-06		up	2.34049	0.00110188	0.000101714
CUST_2190_PI424980000	AAEL004063-RA	WD-repeat protein [Source:VB External Description;Acc:AAEL004063]	up	2.08454	0.00942987	0.00013226		up	2.90014	4.13903e-05	6.76921e-07		up	2.50142	0.000501866	2.11795e-05
CUST_9097_PI424980000	AAEL007383-RA	secreted ferritin G subunit precursor, putative [Source:VB External Description;Acc:AAEL007383]	up	2.07444	0.0142051	0.000659848		up	2.35185	0.000333699	5.2424e-05		up	2.41803	0.000467176	1.81587e-05
CUST_9098_PI424980000	AAEL007383-RB	secreted ferritin G subunit precursor, putative [Source:VB External Description;Acc:AAEL007383]	up	2.06732	0.0160525	0.000916413		up	2.3669	0.000118348	8.13776e-06		up	2.25681	0.00146423	0.000169892
CUST_6878_PI424980000	AAEL004558-RA	tRNA (guanine-N(7)-)-methyltransferase subunit wuho [Source:VB External Description;Acc:AAEL004558]	up	2.05656	0.0103195	0.000197185		up	2.63855	0.000112483	7.54415e-06		up	2.3212	0.000416059	1.26454e-05
CUST_13180_PI424980000	AAEL010640-RA	phosphoribosylamine-glycine ligase [Source:VB External Description;Acc:AAEL010640]	up	2.0438	0.0149432	0.000755159		up	3.50148	0.000172739	1.60008e-05		up	2.49424	0.0019171	0.000261413
CUST_12617_PI424980000	AAEL009308-RA	WD-repeat protein [Source:VB External Description;Acc:AAEL009308]	up	1.98162	0.0110233	0.000243377		up	2.28885	0.000118411	8.15638e-06		up	2.79433	0.00045195	1.68918e-05
CUST_6761_PI424980000	AAEL014388-RA	conserved hypothetical protein [Source:VB External Description;Acc:AAEL014388]	up	1.87007	0.0104586	0.000203798		up	2.57378	6.1303e-05	2.00042e-06		up	2.15679	0.000196623	2.05809e-06
CUST_10869_PI424980000	AAEL007999-RA	conserved hypothetical protein [Source:VB External Description;Acc:AAEL007999]	up	1.85994	0.0135697	0.000547728		up	2.9455	0.000209675	2.36407e-05		up	2.39705	0.00201341	0.000281162
CUST_10507_PI424980000	AAEL010698-RA	importin beta-4 [Source:VB External Description;Acc:AAEL010698]	up	1.77183	0.0131206	0.000518361		up	2.21818	0.000207345	2.32155e-05		up	2.264	0.000115625	3.98417e-07
CUST_10954_PI424980000	AAEL002913-RA	peroxisomal membrane protein 70 abcd3 [Source:VB External Description;Acc:AAEL002913]	up	1.74416	0.01917	0.00147747		up	4.40846	0.000111828	7.4867e-06		up	2.46764	0.00128857	0.000135883
CUST_74_PI424980000	AAEL014684-RA	cytochrome P450 [Source:VB External Description;Acc:AAEL014684]	up	1.7054	0.0117345	0.000360481		up	3.35463	3.91445e-05	5.57508e-07		up	7.22169	0.000164004	8.70245e-07
CUST_6193_PI424980000	AAEL001813-RA	sodium/solute symporter [Source:VB External Description;Acc:AAEL001813]	up	1.65644	0.0168524	0.00103886		up	3.08389	0.00021821	2.52646e-05		up	2.69712	0.00115937	0.000112616
CUST_2398_PI424980000	AAEL004740-RA	35 kDa GTP-binding protein, putative [Source:VB External Description;Acc:AAEL004740]	up	1.6347	0.016262	0.00093737		up	2.38751	0.000284589	3.97184e-05		up	2.09409	0.000266906	4.30005e-06
CUST_3554_PI424980000	AAEL004859-RA	ATP-dependent RNA helicase [Source:VB External Description;Acc:AAEL004859]	up	1.5742	0.0126354	0.000434258		up	3.37377	1.59179e-05	4.61667e-08		up	3.97963	0.00268	0.000446439
CUST_11222_PI424980000	AAEL012990-RA	mrg-binding protein [Source:VB External Description;Acc:AAEL012990]	up	1.52711	0.0122073	0.000401847		up	2.66079	0.000919458	0.000251115		up	4.75308	0.000310398	6.1831e-06
CUST_10936_PI424980000	AAEL010392-RA	hypothetical protein [Source:VB External Description;Acc:AAEL010392]	up	2.44237	0.0142051	0.000661601		down	2.51892	2.66004e-05	2.31448e-07		down	2.25967	0.000752399	4.54961e-05
CUST_6814_PI424980000	AAEL005620-RA	conserved hypothetical protein [Source:VB External Description;Acc:AAEL005620]	down	1.6246	0.00959874	0.00014885		up	2.07823	0.000616468	0.000137448		down	3.89421	0.000164004	8.68964e-07
CUST_1464_PI424980000	AAEL002725-RA	conserved hypothetical protein [Source:VB External Description;Acc:AAEL002725]	down	2.15104	0.0142051	0.000655829		down	2.52609	0.000333134	5.22144e-05		up	22.5648	0.000986634	8.30722e-05
CUST_2674_PI424980000	AAEL013910-RB	conserved hypothetical protein [Source:VB External Description;Acc:AAEL013910]	down	1.79603	0.0178207	0.00121618		up	7.41994	3.97368e-05	5.86493e-07		up	14.6152	0.000789234	5.12994e-05
CUST_2673_PI424980000	AAEL013910-RA	conserved hypothetical protein [Source:VB External Description;Acc:AAEL013910]	down	1.88334	0.0155946	0.000846951		up	7.87798	2.32695e-05	1.58422e-07		up	16.4561	0.00110653	0.000102503
CUST_2276_PI424980000	AAEL012272-RB	fk506 binding protein [Source:VB External Description;Acc:AAEL012272]	down	1.50664	0.00846659	7.95805e-05		down	2.47488	5.3882e-05	1.26322e-06		down	2.46116	0.0018168	0.000239344
CUST_7116_PI424980000	AAEL004361-RA	alpha-glucosidase [Source:VB External Description;Acc:AAEL004361]	down	1.5418	0.0116707	0.000344872		down	3.19783	0.000247705	3.14309e-05		down	4.89828	0.000212589	2.51926e-06
CUST_13521_PI424980000	AAEL009782-RA	brain chitinase and chia [Source:VB External Description;Acc:AAEL009782]	down	1.56223	0.00846659	8.12668e-05		down	2.18957	1.23588e-05	2.63971e-08		down	2.42235	0.000382154	1.00185e-05
CUST_7683_PI424980000	AAEL006372-RA	sulphate transporter [Source:VB External Description;Acc:AAEL006372]	down	1.5908	0.0103195	0.000197967		down	2.8746	0.000333134	5.22132e-05		down	2.97778	0.000837195	5.71655e-05
CUST_3436_PI424980000	AAEL003789-RA	exportin, putative [Source:VB External Description;Acc:AAEL003789]	down	1.60205	0.0199981	0.00164919		down	2.51236	0.00018256	1.80685e-05		down	2.84858	0.000350435	8.06011e-06
CUST_9522_PI424980000	AAEL006342-RC	epoxide hydrolase [Source:VB External Description;Acc:AAEL006342]	down	1.65325	0.0156165	0.000853414		down	3.246	0.000160348	1.3758e-05		down	3.56281	0.00229885	0.000351945
CUST_5391_PI424980000	AAEL005447-RA	hypothetical protein [Source:VB External Description;Acc:AAEL005447]	down	1.65513	0.0193341	0.00153803		down	2.08756	0.00699233	0.00351856		down	2.68063	0.000876582	6.30268e-05
CUST_402_PI424980000	AAEL001069-RA	histone deacetylase [Source:VB External Description;Acc:AAEL001069]	down	1.6624	0.0184752	0.00135577		down	3.38874	0.000118348	8.11915e-06		down	4.60824	0.00100429	8.72834e-05
CUST_5645_PI424980000	AAEL009431-RA	mitochondrial ribosomal protein, L10, putative [Source:VB External Description;Acc:AAEL009431]	down	1.68138	0.012402	0.000419598		down	2.21854	0.000163473	1.42105e-05		down	2.08454	0.000318049	6.43348e-06
CUST_6582_PI424980000	AAEL000640-RA	alanine-glyoxylate aminotransferase [Source:VB External Description;Acc:AAEL000640]	down	1.70781	0.0107838	0.000221679		down	5.1373	0.000661647	0.000155687		down	11.7137	0.000266906	4.60599e-06
CUST_12870_PI424980000	AAEL010292-RA	conserved hypothetical protein [Source:VB External Description;Acc:AAEL010292]	down	1.76866	0.0168917	0.00104533		down	2.20514	0.000698143	0.000168651		down	2.01674	0.00499513	0.00115608
CUST_748_PI424980000	AAEL003027-RA	conserved hypothetical protein [Source:VB External Description;Acc:AAEL003027]	down	1.78039	0.0142051	0.000654537		down	14.8793	0.000122068	8.50234e-06		down	4.1348	0.00510424	0.00118953
CUST_2445_PI424980000	AAEL002026-RA	protein serine/threonine kinase, putative [Source:VB External Description;Acc:AAEL002026]	down	1.79519	0.0182413	0.00131048		down	3.57023	0.00327215	0.00137766		down	4.22364	0.000846093	5.82075e-05
CUST_12289_PI424980000	AAEL007843-RA	symbol, putative [Source:VB External Description;Acc:AAEL007843]	down	1.81764	0.0112033	0.000282296		down	2.10033	0.000118348	8.12941e-06		down	2.13009	0.00105801	9.46219e-05
CUST_3812_PI424980000	AAEL012721-RA	conserved hypothetical protein [Source:VB External Description;Acc:AAEL012721]	down	1.87608	0.0137511	0.000565355		down	9.19182	0.000174855	1.64184e-05		down	2.41432	0.00446633	0.000962918
CUST_10394_PI424980000	AAEL012153-RA	conserved hypothetical protein [Source:VB External Description;Acc:AAEL012153]	down	2.14506	0.0176837	0.00119068		down	2.30751	0.000106652	6.68911e-06		down	2.0785	0.000423359	1.32988e-05
CUST_13464_PI424980000	AAEL008858-RA	deoxyribonuclease I, putative [Source:VB External Description;Acc:AAEL008858]	down	2.25828	0.0112553	0.000299056		down	2.18357	0.000285404	3.99521e-05		down	2.56177	0.000352813	8.33216e-06
CUST_7929_PI424980000	AAEL008604-RA	zinc carboxypeptidase [Source:VB External Description;Acc:AAEL008604]	down	2.40801	0.00726305	3.11051e-05		down	2.94046	0.00025681	3.35895e-05		down	4.59021	7.85784e-05	5.88106e-08
CUST_1708_PI424980000	AAEL003186-RA	hypothetical protein [Source:VB External Description;Acc:AAEL003186]	down	2.41976	0.0158949	0.00088138		down	2.26549	0.000576007	0.000123694		down	3.87919	0.00533986	0.00127319
CUST_429_PI424980000	AAEL008963-RA	tyrosine aminotransferase [Source:VB External Description;Acc:AAEL008963]	down	2.43217	0.00666947	2.30031e-05		down	2.73915	5.62025e-05	1.60287e-06		down	2.28776	0.00342098	0.000644221
CUST_3254_PI424980000	AAEL011575-RA	conserved hypothetical protein [Source:VB External Description;Acc:AAEL011575]	down	2.45167	0.0175844	0.00114845		down	2.9721	0.000317135	4.80668e-05		down	2.87526	0.00325503	0.000598933
CUST_13692_PI424980000	AAEL009330-RA	carbonic anhydrase II, putative [Source:VB External Description;Acc:AAEL009330]	down	2.45289	0.0196743	0.00159285		down	2.95029	0.00577835	0.0027778		down	2.52126	0.00481823	0.00108014
CUST_4217_PI424980000	AAEL011335-RA	conserved hypothetical protein [Source:VB External Description;Acc:AAEL011335]	down	2.57683	0.00951687	0.000143455		down	6.00255	9.84483e-05	5.96043e-06		down	3.82226	0.000467176	1.83748e-05
CUST_10008_PI424980000	AAEL011547-RA	metalloproteinase, putative [Source:VB External Description;Acc:AAEL011547]	down	2.62127	0.0184752	0.00135992		down	2.0113	0.000735594	0.000182943		down	4.86739	0.00017414	1.10423e-06
CUST_13121_PI424980000	AAEL005531-RA	venom allergen [Source:VB External Description;Acc:AAEL005531]	down	2.63312	0.0164218	0.000977953		down	5.37179	0.00206066	0.000750305		down	2.3215	0.00624351	0.00159245
CUST_6163_PI424980000	AAEL015391-RA	gamma glutamyl transpeptidases [Source:VB External Description;Acc:AAEL015391]	down	2.69658	0.0148119	0.000743442		down	2.60693	0.000698055	0.000168476		down	3.84934	0.000291116	5.58977e-06
CUST_771_PI424980000	AAEL004292-RA	hypothetical protein [Source:VB External Description;Acc:AAEL004292]	down	2.74348	0.0185297	0.00136691		down	4.07421	0.000609408	0.0001351		down	2.03692	0.00196956	0.000273219
CUST_3815_PI424980000	AAEL009463-RA	hypothetical protein [Source:VB External Description;Acc:AAEL009463]	down	2.79482	0.0130455	0.00050384		down	2.56325	0.000370349	6.22545e-05		down	2.53442	0.00143036	0.000163613
CUST_12643_PI424980000	AAEL008708-RA	lysosomal pro-X carboxypeptidase, putative [Source:VB External Description;Acc:AAEL008708]	down	2.79814	0.0175823	0.00114454		down	2.61868	2.56732e-05	2.04765e-07		down	2.52944	0.0029211	0.000505996
CUST_3027_PI424980000	AAEL011112-RA	alcohol dehydrogenase [Source:VB External Description;Acc:AAEL011112]	down	2.80883	0.0176059	0.00115896		down	2.82153	0.000568417	0.000121403		down	3.77711	0.000701384	4.12663e-05
CUST_3029_PI424980000	AAEL011112-RC	alcohol dehydrogenase [Source:VB External Description;Acc:AAEL011112]	down	2.81829	0.016262	0.000939085		down	2.77593	0.000542155	0.000113008		down	3.45139	0.000405887	1.18361e-05
CUST_3585_PI424980000	AAEL005781-RA	hypothetical protein [Source:VB External Description;Acc:AAEL005781]	down	2.82767	0.00846659	9.03471e-05		down	5.95134	0.00160646	0.000533869		down	4.97232	0.000910182	6.82239e-05
CUST_3028_PI424980000	AAEL011112-RB	alcohol dehydrogenase [Source:VB External Description;Acc:AAEL011112]	down	2.84096	0.0199981	0.001657		down	2.7778	0.000750082	0.000187815		down	3.43768	0.000674497	3.77782e-05
CUST_111_PI424980000	AAEL001312-RA	cytochrome P450 [Source:VB External Description;Acc:AAEL001312]	down	2.9016	0.00846659	9.86669e-05		down	3.68697	0.000129658	9.46385e-06		down	6.84719	0.000369777	8.88467e-06
CUST_10905_PI424980000	AAEL014920-RA	lipase 1 precursor [Source:VB External Description;Acc:AAEL014920]	down	2.9306	0.00846659	7.44292e-05		down	2.39093	0.00453364	0.00205781		down	2.4738	0.00205101	0.000289362
CUST_1997_PI424980000	AAEL012560-RA	serine collagenase 1 precursor, putative [Source:VB External Description;Acc:AAEL012560]	down	3.05141	0.0108479	0.00022532		down	2.12962	0.000407599	7.23581e-05		down	3.08803	0.000195289	1.80871e-06
CUST_443_PI424980000	AAEL005749-RA	lysosomal alpha-mannosidase (mannosidase alpha class 2b member 1) [Source:VB External Description;Acc:AAEL005749]	down	3.17553	0.0139186	0.000606516		down	5.38902	2.30262e-05	1.44696e-07		down	7.28723	0.000164581	9.37603e-07
CUST_1184_PI424980000	AAEL002950-RA	conserved hypothetical protein [Source:VB External Description;Acc:AAEL002950]	down	3.2613	0.0110233	0.000242894		down	3.44665	0.000438056	8.08977e-05		down	2.16841	0.00374653	0.000738001
CUST_7407_PI424980000	AAEL002018-RA	hypothetical protein [Source:VB External Description;Acc:AAEL002018]	down	3.33825	0.0163754	0.000955524		down	16.3396	0.000101115	6.1952e-06		down	7.59407	0.000352813	8.32e-06
CUST_4199_PI424980000	AAEL007051-RA	lipase [Source:VB External Description;Acc:AAEL007051]	down	3.6907	0.0142051	0.000635774		down	2.89511	0.000706676	0.000171652		down	6.66101	0.000553393	2.51476e-05
CUST_6879_PI424980000	AAEL003599-RA	conserved hypothetical protein [Source:VB External Description;Acc:AAEL003599]	down	3.71469	0.00880021	0.000113065		down	3.42411	5.62025e-05	1.59292e-06		down	4.11601	0.000175815	1.49837e-06
CUST_199_PI424980000	AAEL003181-RA	carboxy/choline esterase Alpha esterase CCEAE3C	down	3.75544	0.00993762	0.000176724		down	2.46063	0.00013047	9.60199e-06		down	3.03523	0.00135821	0.000149192
CUST_13881_PI424980000	AAEL001286-RA	predicted protein [Source:VB External Description;Acc:AAEL001286]	down	3.93598	0.0109289	0.000231683		down	9.05841	4.5852e-05	8.89066e-07		down	5.11753	0.000659391	3.62906e-05
CUST_227_PI424980000	AAEL003201-RA	carboxy/choline esterase Alpha esterase CCEAE5C	down	4.06214	0.00444702	5.80824e-06		down	3.44033	0.000212618	2.43065e-05		down	8.34892	0.00013776	5.23373e-07
CUST_197_PI424980000	AAEL003196-RA	carboxy/choline esterase Alpha esterase CCEAE2C	down	4.32671	0.0110233	0.000266902		down	2.32251	0.000205288	2.22777e-05		down	3.41002	0.000467176	1.84203e-05
CUST_2371_PI424980000	AAEL011079-RA	C-Type lectin (CTL) - mannose binding. [Source:VB External Description;Acc:AAEL011079]	down	4.33083	0.0139186	0.000596272		down	2.66841	4.45442e-05	8.23597e-07		down	3.52739	0.000266906	4.51084e-06
CUST_424_PI424980000	AAEL011922-RA	serine-type enodpeptidase, [Source:VB External Description;Acc:AAEL011922]	down	4.42665	0.00841358	6.02609e-05		down	3.78188	4.48719e-05	8.42209e-07		down	8.2213	0.000266906	4.20195e-06
CUST_12524_PI424980000	AAEL011341-RA	apyrase, putative [Source:VB External Description;Acc:AAEL011341]	down	4.65426	0.0117345	0.000360579		down	4.68537	0.00013503	1.01986e-05		down	2.39514	0.000323755	7.05929e-06
CUST_5747_PI424980000	AAEL014916-RA	lipase 1 precursor [Source:VB External Description;Acc:AAEL014916]	down	4.68562	0.0111755	0.000279591		down	3.93558	0.000192129	1.98161e-05		down	5.14691	0.000438305	1.58868e-05
CUST_63_PI424980000	AAEL015654-RA	cytochrome P450 [Source:VB External Description;Acc:AAEL015654]	down	4.77472	0.0176837	0.0011916		down	2.88382	0.000484925	9.51445e-05		down	9.0952	0.00017414	1.32145e-06
CUST_2213_PI424980000	AAEL009968-RA	hypothetical protein [Source:VB External Description;Acc:AAEL009968]	down	4.84542	0.0110233	0.000268937		down	4.70728	9.57925e-05	5.54497e-06		down	2.47709	0.000977517	8.05983e-05
CUST_1910_PI424980000	AAEL011129-RA	alcohol dehydrogenase [Source:VB External Description;Acc:AAEL011129]	down	5.13909	0.0168524	0.00103721		down	3.71393	6.65454e-05	2.61474e-06		down	5.4068	0.00017414	1.23168e-06
CUST_706_PI424980000	AAEL008939-RA	conserved hypothetical protein [Source:VB External Description;Acc:AAEL008939]	down	5.20632	0.0191292	0.00144184		down	6.02145	0.000111213	7.39182e-06		down	6.03491	0.000154474	7.13761e-07
CUST_10611_PI424980000	AAEL007052-RA	lipase [Source:VB External Description;Acc:AAEL007052]	down	5.56017	0.010261	0.000188961		down	3.99956	0.000226197	2.66516e-05		down	7.52634	0.000403887	1.15057e-05
CUST_731_PI424980000	AAEL001306-RA	conserved hypothetical protein [Source:VB External Description;Acc:AAEL001306]	down	5.62783	0.0112162	0.000288417		down	6.30058	9.36444e-05	5.26219e-06		down	3.89364	0.00320759	0.000584606
CUST_787_PI424980000	AAEL011933-RA	hypothetical protein [Source:VB External Description;Acc:AAEL011933]	down	5.96399	0.0138067	0.000570598		down	4.59677	0.000200533	2.1327e-05		down	5.59788	0.000139508	5.45478e-07
CUST_7743_PI424980000	AAEL012557-RA	serine collagenase 1 precursor, putative [Source:VB External Description;Acc:AAEL012557]	down	6.44519	0.0116609	0.000333347		down	2.69605	0.00776893	0.00399867		down	11.9527	7.85784e-05	2.704e-08

## Sheet: Table S3c
			CucR vs NO					CucR vs BB					CucP vs CucR					CucR vs CucU
ProbeName	SystematicName_curated _ Vectorbase link	Vectorbase Description	regulation	FCAbsolute	Corrected p-value	p-value		regulation	FCAbsolute	Corrected p-value	p-value		regulation	FCAbsolute	Corrected p-value	p-value		regulation	FCAbsolute	Corrected p-value	p-value
CUST_908_PI424980000	AAEL011230-RA	chymotrypsin, putative [Source:VB External Description;Acc:AAEL011230]	up	87.1405	2.30262e-05	1.29972e-07		up	28.3653	0.000434982	1.48901e-05		down	122.931	0.00087858	2.0394e-05		up	30.2073	0.00860195	0.000105913
CUST_714_PI424980000	AAEL001418-RA	conserved hypothetical protein [Source:VB External Description;Acc:AAEL001418]	up	26.2441	3.91445e-05	5.67229e-07		up	4.70311	0.000636746	3.37042e-05		down	28.7479	0.000820555	1.48988e-05		up	13.0022	0.0105927	0.000208361
CUST_1435_PI424980000	AAEL003076-RA	glucosyl/glucuronosyl transferases [Source:VB External Description;Acc:AAEL003076]	up	13.6481	2.58062e-05	2.15529e-07		up	16.0943	7.85784e-05	5.62642e-08		down	22.365	0.000649642	4.84253e-06		up	10.3848	0.00444702	1.42448e-06
CUST_13794_PI424980000	AAEL013263-RA	high affinity copper transporter, putative [Source:VB External Description;Acc:AAEL013263]	up	4.41498	0.00312428	0.00129388		up	9.73432	0.00228584	0.000348993		down	11.1294	0.00340199	0.000533389		up	6.73398	0.0112553	0.000305781
CUST_4380_PI424980000	AAEL015657-RA	conserved hypothetical protein [Source:VB External Description;Acc:AAEL015657]	up	14.536	0.000162818	1.40879e-05		up	13.5121	0.00145202	0.000167879		down	10.7666	0.000834161	1.7141e-05		up	8.14072	0.0128237	0.000459256
CUST_12636_PI424980000	AAEL013406-RA	venom allergen [Source:VB External Description;Acc:AAEL013406]	up	7.89948	5.39406e-05	1.27824e-06		up	4.23497	0.000610462	3.16545e-05		down	9.89972	0.000924748	2.2343e-05		up	2.41709	0.017318	0.00109332
CUST_843_PI424980000	AAEL011175-RA	alkaline phosphatase [Source:VB External Description;Acc:AAEL011175]	up	6.17759	6.53031e-05	2.52469e-06		up	12.774	0.000102949	2.39654e-07		down	7.79645	0.00232259	0.000257049		up	5.69818	0.0191292	0.00145824
CUST_4215_PI424980000	AAEL005045-RA	ATP-dependent bile acid permease [Source:VB External Description;Acc:AAEL005045]	up	3.37536	9.28454e-05	5.20607e-06		up	2.60687	0.00054408	2.45252e-05		down	7.48687	0.000932682	2.36652e-05		up	2.88556	0.00977092	0.000168501
CUST_850_PI424980000	AAEL015070-RA	alkaline phosphatase [Source:VB External Description;Acc:AAEL015070]	up	5.07945	0.000205536	2.24538e-05		up	13.5021	0.000917293	6.96111e-05		down	6.85304	0.00223565	0.000237234		up	5.08556	0.0191798	0.00148469
CUST_8991_PI424980000	AAEL000813-RA	dimethylaniline monooxygenase [Source:VB External Description;Acc:AAEL000813]	up	3.22796	0.000177055	1.69032e-05		up	2.53871	0.00149823	0.000176914		down	6.71281	0.000949213	2.47877e-05		up	5.38796	0.00860195	0.000105688
CUST_2629_PI424980000	AAEL015010-RA	acetyl-coa synthetase [Source:VB External Description;Acc:AAEL015010]	up	7.11583	8.49164e-05	4.4331e-06		up	5.27427	7.85784e-05	4.14997e-08		down	5.23208	0.000649642	9.31684e-07		up	5.23394	0.00666947	2.39286e-05
CUST_13857_PI424980000	AAEL008281-RA	conserved hypothetical protein [Source:VB External Description;Acc:AAEL008281]	up	2.7307	0.000347474	5.62676e-05		up	3.37126	0.000783058	5.05642e-05		down	5.22674	0.00150738	9.92656e-05		up	2.28326	0.0148234	0.000745933
CUST_499_PI424980000	AAEL008844-RA	calcium-binding protein, putative [Source:VB External Description;Acc:AAEL008844]	up	2.40802	0.00106117	0.000305623		up	4.61782	0.00323442	0.000592729		down	5.06511	0.00241283	0.000279038		up	3.08015	0.00942987	0.000131118
CUST_81_PI424980000	AAEL009124-RA	cytochrome P450 [Source:VB External Description;Acc:AAEL009124]	up	3.97718	1.63659e-05	4.94437e-08		up	4.39711	0.00084885	5.85038e-05		down	4.76871	0.000706739	7.24243e-06		up	2.33566	0.0160041	0.000892732
CUST_74_PI424980000	AAEL014684-RA	cytochrome P450 [Source:VB External Description;Acc:AAEL014684]	up	3.35463	3.91445e-05	5.57508e-07		up	7.22169	0.000164004	8.70245e-07		down	4.68299	0.000734237	9.3612e-06		up	1.7054	0.0117345	0.000360481
CUST_2070_PI424980000	AAEL001194-RA	fatty acid synthase [Source:VB External Description;Acc:AAEL001194]	up	5.4742	4.48852e-05	8.62447e-07		up	3.23371	0.000254553	3.50243e-06		down	4.54744	0.0010486	3.83582e-05		up	4.14015	0.00841358	6.43962e-05
CUST_460_PI424980000	AAEL011167-RA	cathepsin l [Source:VB External Description;Acc:AAEL011167]	up	5.43696	0.000943158	0.000260893		up	17.4955	0.000102949	2.33085e-07		down	4.31602	0.00105793	4.0015e-05		up	13.2134	0.00846659	0.000100536
CUST_7628_PI424980000	AAEL008651-RA	conserved hypothetical protein [Source:VB External Description;Acc:AAEL008651]	up	3.44622	0.000676524	0.000161058		up	28.4419	0.000393545	1.08909e-05		down	3.97396	0.00167757	0.000129949		up	3.12288	0.018581	0.00138238
CUST_3453_PI424980000	AAEL000520-RA	conserved hypothetical protein [Source:VB External Description;Acc:AAEL000520]	up	5.77128	0.00011044	7.22034e-06		up	2.95138	0.000719309	4.26164e-05		down	3.46433	0.000809723	1.36263e-05		up	2.5778	0.0112815	0.000314025
CUST_3759_PI424980000	AAEL007271-RA	basic helix-loop-helix zip transcription factor [Source:VB External Description;Acc:AAEL007271]	up	4.97068	0.000118348	8.09384e-06		up	4.10711	0.00141882	0.000161418		down	3.40595	0.00153397	0.000104272		up	2.30181	0.0101826	0.000186426
CUST_694_PI424980000	AAEL012866-RA	conserved hypothetical protein [Source:VB External Description;Acc:AAEL012866]	up	3.88044	8.08919e-06	5.44099e-09		up	4.37551	0.000380424	9.77398e-06		down	3.31414	0.00127552	6.62536e-05		up	2.29333	0.019692	0.00160098
CUST_4066_PI424980000	AAEL014843-RA	heat shock protein [Source:VB External Description;Acc:AAEL014843]	up	11.4998	2.32695e-05	1.66413e-07		up	6.20851	0.000263297	3.92282e-06		down	3.20986	0.000932682	2.35726e-05		up	5.8681	0.0112815	0.000308563
CUST_1204_PI424980000	AAEL005991-RA	tricarboxylate transport protein [Source:VB External Description;Acc:AAEL005991]	up	2.20993	0.000917453	0.000250456		up	4.37426	0.000873987	6.24597e-05		down	3.09774	0.00283998	0.000372876		up	2.38252	0.0199981	0.00165938
CUST_1149_PI424980000	AAEL011704-RA	heat shock protein [Source:VB External Description;Acc:AAEL011704]	up	8.23451	5.57199e-05	1.47153e-06		up	2.19961	0.00137535	0.000153224		down	3.04973	0.00231646	0.000255394		up	4.13315	0.0119507	0.000378738
CUST_9855_PI424980000	AAEL007799-RA	regulator of chromosome condensation [Source:VB External Description;Acc:AAEL007799]	up	3.73545	0.000178469	1.70813e-05		up	2.21456	0.000429435	1.41642e-05		down	2.88042	0.0018878	0.000170936		up	3.46408	0.00666947	2.34606e-05
CUST_9856_PI424980000	AAEL007799-RB	regulator of chromosome condensation [Source:VB External Description;Acc:AAEL007799]	up	3.73827	0.000152289	1.25746e-05		up	2.2678	0.000751044	4.51907e-05		down	2.83465	0.00225433	0.000241319		up	3.45874	0.00666947	2.64208e-05
CUST_5859_PI424980000	AAEL004455-RA	conserved hypothetical protein [Source:VB External Description;Acc:AAEL004455]	up	3.61879	6.709e-05	2.74772e-06		up	2.15639	0.00132321	0.00014103		down	2.7238	0.00406833	0.0007407		up	3.12406	0.0110233	0.000241007
CUST_8393_PI424980000	AAEL008723-RA	conserved hypothetical protein [Source:VB External Description;Acc:AAEL008723]	up	4.36224	0.000192129	1.98282e-05		up	2.01115	0.00320712	0.000583959		down	2.62118	0.00207536	0.00020517		up	2.92239	0.0154135	0.000818669
CUST_14163_PI424980000	AAEL013946-RA	conserved hypothetical protein [Source:VB External Description;Acc:AAEL013946]	up	3.87709	0.000163473	1.4438e-05		up	5.35438	0.00341885	0.000643119		down	2.60936	0.00216493	0.000222843		up	2.17288	0.0178207	0.00121921
CUST_5037_PI424980000	AAEL006820-RA	lipid storage droplets surface binding protein 2 (lsd2) [Source:VB External Description;Acc:AAEL006820]	up	4.71691	2.50211e-05	1.96541e-07		up	4.02552	0.000416059	1.25963e-05		down	2.48598	0.00163124	0.000121609		up	4.77836	0.00444702	3.6143e-06
CUST_1568_PI424980000	AAEL012100-RA	conserved hypothetical protein [Source:VB External Description;Acc:AAEL012100]	up	3.17689	8.31073e-05	4.1177e-06		up	3.11337	0.00114382	0.000108958		down	2.47111	0.00263848	0.000322633		up	2.43114	0.0138619	0.000584175
CUST_3531_PI424980000	AAEL012185-RA	ribosome biogenesis regulatory protein [Source:VB External Description;Acc:AAEL012185]	up	2.92532	6.45318e-05	2.33405e-06		up	2.77432	0.000380424	9.75589e-06		down	2.45529	0.00281958	0.000367568		up	2.57598	0.00824098	4.32342e-05
CUST_10954_PI424980000	AAEL002913-RA	peroxisomal membrane protein 70 abcd3 [Source:VB External Description;Acc:AAEL002913]	up	4.40846	0.000111828	7.4867e-06		up	2.46764	0.00128857	0.000135883		down	2.39313	0.00298257	0.000412506		up	1.74416	0.01917	0.00147747
CUST_14131_PI424980000	AAEL010118-RA	kelch repeat protein [Source:VB External Description;Acc:AAEL010118]	up	3.20444	2.65049e-05	2.27413e-07		up	2.03001	0.000771487	4.84012e-05		down	2.29085	0.00146984	9.35211e-05		up	2.56734	0.0146469	0.000718642
CUST_76_PI424980000	AAEL009127-RA	cytochrome P450 [Source:VB External Description;Acc:AAEL009127]	up	3.81572	5.47151e-05	1.36143e-06		up	3.13289	0.000701384	4.11685e-05		down	2.24777	0.000924748	2.24239e-05		up	2.31876	0.00959874	0.000153444
CUST_3562_PI424980000	AAEL003654-RA	conserved hypothetical protein [Source:VB External Description;Acc:AAEL003654]	up	3.41491	5.28226e-05	1.21284e-06		up	2.1883	0.00204294	0.000287174		down	2.16495	0.0013876	8.21054e-05		up	2.37815	0.0137925	0.000568534
CUST_6193_PI424980000	AAEL001813-RA	sodium/solute symporter [Source:VB External Description;Acc:AAEL001813]	up	3.08389	0.00021821	2.52646e-05		up	2.69712	0.00115937	0.000112616		down	2.10977	0.00155507	0.000109071		up	1.65644	0.0168524	0.00103886
CUST_2520_PI424980000	AAEL000300-RA	WD-repeat protein [Source:VB External Description;Acc:AAEL000300]	up	2.71169	0.000233994	2.84752e-05		up	2.08551	0.000601219	3.01755e-05		down	2.07505	0.0025698	0.000306778		up	2.23622	0.0133294	0.000528038
CUST_2190_PI424980000	AAEL004063-RA	WD-repeat protein [Source:VB External Description;Acc:AAEL004063]	up	2.90014	4.13903e-05	6.76921e-07		up	2.50142	0.000501866	2.11795e-05		down	2.0699	0.00373801	0.000632109		up	2.08454	0.00942987	0.00013226
CUST_6746_PI424980000	AAEL003949-RA	conserved hypothetical protein [Source:VB External Description;Acc:AAEL003949]	up	2.50363	0.000310151	4.59885e-05		up	2.54886	0.001683	0.000212903		down	2.05712	0.00168595	0.000132428		up	2.25909	0.0151206	0.000773839
CUST_2191_PI424980000	AAEL008124-RA	possible RNA methyltransferase, putative [Source:VB External Description;Acc:AAEL008124]	up	2.92083	0.000812424	0.000209709		up	2.54533	0.000266906	4.3246e-06		down	2.00886	0.00357609	0.000584034		up	2.24827	0.0181001	0.00125848
CUST_197_PI424980000	AAEL003196-RA	carboxy/choline Esterase Alpha esterase CCEAE2C	down	2.32251	0.000205288	2.22777e-05		down	3.41002	0.000467176	1.84203e-05		down	2.74085	0.00146522	9.30522e-05		down	4.32671	0.0110233	0.000266902
CUST_199_PI424980000	AAEL003181-RA	carboxy/choline Esterase Alpha esterase CCEAE3C	down	2.46063	0.00013047	9.60199e-06		down	3.03523	0.00135821	0.000149192		down	5.16234	0.000649642	1.50563e-06		down	3.75544	0.00993762	0.000176724
CUST_4217_PI424980000	AAEL011335-RA	conserved hypothetical protein [Source:VB External Description;Acc:AAEL011335]	down	6.00255	9.84483e-05	5.96043e-06		down	3.82226	0.000467176	1.83748e-05		down	3.38441	0.00100716	3.27232e-05		down	2.57683	0.00951687	0.000143455
CUST_10611_PI424980000	AAEL007052-RA	lipase [Source:VB External Description;Acc:AAEL007052]	down	3.99956	0.000226197	2.66516e-05		down	7.52634	0.000403887	1.15057e-05		down	4.53087	0.00168643	0.000132931		down	5.56017	0.010261	0.000188961
CUST_787_PI424980000	AAEL011933-RA	hypothetical protein [Source:VB External Description;Acc:AAEL011933]	down	4.59677	0.000200533	2.1327e-05		down	5.59788	0.000139508	5.45478e-07		down	2.62543	0.0032359	0.000483877		down	5.96399	0.0138067	0.000570598
CUST_7743_PI424980000	AAEL012557-RA	serine collagenase 1 precursor, putative [Source:VB External Description;Acc:AAEL012557]	down	2.69605	0.00776893	0.00399867		down	11.9527	7.85784e-05	2.704e-08		down	9.30876	0.00153816	0.000106954		down	6.44519	0.0116609	0.000333347
CUST_4199_PI424980000	AAEL007051-RA	lipase [Source:VB External Description;Acc:AAEL007051]	down	2.89511	0.000706676	0.000171652		down	6.66101	0.000553393	2.51476e-05		down	5.14003	0.00122284	6.08251e-05		down	3.6907	0.0142051	0.000635774
CUST_111_PI424980000	AAEL001312-RA	cytochrome P450 [Source:VB External Description;Acc:AAEL001312]	down	3.68697	0.000129658	9.46385e-06		down	6.84719	0.000369777	8.88467e-06		up	2.85187	0.00226877	0.00024545		down	2.9016	0.00846659	9.86669e-05
CUST_3254_PI424980000	AAEL011575-RA	conserved hypothetical protein [Source:VB External Description;Acc:AAEL011575]	down	2.9721	0.000317135	4.80668e-05		down	2.87526	0.00325503	0.000598933		up	3.22178	0.00150385	9.78674e-05		down	2.45167	0.0175844	0.00114845
CUST_1184_PI424980000	AAEL002950-RA	conserved hypothetical protein [Source:VB External Description;Acc:AAEL002950]	down	3.44665	0.000438056	8.08977e-05		down	2.16841	0.00374653	0.000738001		up	4.11621	0.00564424	0.00125438		down	3.2613	0.0110233	0.000242894
CUST_5391_PI424980000	AAEL005447-RA	hypothetical protein [Source:VB External Description;Acc:AAEL005447]	down	2.08756	0.00699233	0.00351856		down	2.68063	0.000876582	6.30268e-05		up	2.11694	0.00339775	0.000531706		down	1.65513	0.0193341	0.00153803
CUST_2371_PI424980000	AAEL011079-RA	C-Type lectin (CTL) - mannose binding. [Source:VB External Description;Acc:AAEL011079]	down	2.66841	4.45442e-05	8.23597e-07		down	3.52739	0.000266906	4.51084e-06		up	3.80797	0.00106889	4.16878e-05		down	4.33083	0.0139186	0.000596272
CUST_7407_PI424980000	AAEL002018-RA	hypothetical protein [Source:VB External Description;Acc:AAEL002018]	down	16.3396	0.000101115	6.1952e-06		down	7.59407	0.000352813	8.32e-06		up	3.39503	0.00653462	0.00158281		down	3.33825	0.0163754	0.000955524
CUST_12524_PI424980000	AAEL011341-RA	apyrase, putative [Source:VB External Description;Acc:AAEL011341]	down	4.68537	0.00013503	1.01986e-05		down	2.39514	0.000323755	7.05929e-06		up	3.10002	0.00182024	0.000157726		down	4.65426	0.0117345	0.000360579
CUST_3436_PI424980000	AAEL003789-RA	exportin, putative [Source:VB External Description;Acc:AAEL003789]	down	2.51236	0.00018256	1.80685e-05		down	2.84858	0.000350435	8.06011e-06		up	2.20915	0.00106889	4.26178e-05		down	1.60205	0.0199981	0.00164919
CUST_7683_PI424980000	AAEL006372-RA	sulphate transporter [Source:VB External Description;Acc:AAEL006372]	down	2.8746	0.000333134	5.22132e-05		down	2.97778	0.000837195	5.71655e-05		up	2.35114	0.00142365	8.66081e-05		down	1.5908	0.0103195	0.000197967
CUST_1910_PI424980000	AAEL011129-RA	alcohol dehydrogenase [Source:VB External Description;Acc:AAEL011129]	down	3.71393	6.65454e-05	2.61474e-06		down	5.4068	0.00017414	1.23168e-06		up	2.27129	0.00477755	0.00095749		down	5.13909	0.0168524	0.00103721
CUST_3812_PI424980000	AAEL012721-RA	conserved hypothetical protein [Source:VB External Description;Acc:AAEL012721]	down	9.19182	0.000174855	1.64184e-05		down	2.41432	0.00446633	0.000962918		up	3.20295	0.00426877	0.000797397		down	1.87608	0.0137511	0.000565355
CUST_2213_PI424980000	AAEL009968-RA	hypothetical protein [Source:VB External Description;Acc:AAEL009968]	down	4.70728	9.57925e-05	5.54497e-06		down	2.47709	0.000977517	8.05983e-05		up	3.01518	0.00144477	8.87822e-05		down	4.84542	0.0110233	0.000268937
CUST_68_PI424980000	AAEL017539-RA	cytochrome P450 [Source:VB External Description;Acc:AAEL017539] CYP6BY1	up	4.3449	183.811	183.034		up	3.18626	0.00118377	1168.53							up	2.58583	0.00483007	0.781598
CUST_9099_PI424980000	AAEL007383-RC	secreted ferritin G subunit precursor, putative [Source:VB External Description;Acc:AAEL007383]	up	2.37242	172.357	158.923		up	2.34343	812.507	54.0614							up	2.12662	0.0160866	9231.74
CUST_9100_PI424980000	AAEL007383-RD	secreted ferritin G subunit precursor, putative [Source:VB External Description;Acc:AAEL007383]	up	2.41042	1264.06	9.08901		up	2.34049	0.00110188	10171.4							up	2.12545	0.0158949	877.228
CUST_2398_PI424980000	AAEL004740-RA	35 kDa GTP-binding protein, putative [Source:VB External Description;Acc:AAEL004740]	up	2.38751	284.589	397.184		up	2.09409	266.906	43.0005							up	1.6347	0.016262	937.37
CUST_11629_PI424980000	AAEL012032-RA	hypothetical protein [Source:VB External Description;Acc:AAEL012032]	up	2.91269	292.283	3.14221		up	3.58234	0.00361946	700.403							up	3.19031	0.00444702	33.4061
CUST_12617_PI424980000	AAEL009308-RA	WD-repeat protein [Source:VB External Description;Acc:AAEL009308]	up	2.28885	1184.11	8.15638		up	2.79433	451.95	16.8919							up	1.98162	0.0110233	243.377
CUST_9097_PI424980000	AAEL007383-RA	secreted ferritin G subunit precursor, putative [Source:VB External Description;Acc:AAEL007383]	up	2.35185	3336.99	52.424		up	2.41803	4671.76	181.587							up	2.07444	0.0142051	6598.48
CUST_11686_PI424980000	AAEL007046-RA	mitochondrial brown fat uncoupling protein [Source:VB External Description;Acc:AAEL007046]	up	2.47655	0.00219227	8130.62		up	3.58393	0.00264704	4370.52							up	3.00253	0.0176059	0.00115548
CUST_10507_PI424980000	AAEL010698-RA	importin beta-4 [Source:VB External Description;Acc:AAEL010698]	up	2.21818	2073.45	232.155		up	2.264	11562.5	3.98417							up	1.77183	0.0131206	5183.61
CUST_6761_PI424980000	AAEL014388-RA	conserved hypothetical protein [Source:VB External Description;Acc:AAEL014388]	up	2.57378	613.03	2.00042		up	2.15679	1966.23	20.5809							up	1.87007	0.0104586	2037.98
CUST_13879_PI424980000	AAEL006600-RD	juvenile hormone-inducible protein, putative [Source:VB External Description;Acc:AAEL006600]	up	3.93575	0.00167168	5646.33		up	4.73578	930.738	72.5362							up	3.25625	0.0191576	0.00146784
CUST_11222_PI424980000	AAEL012990-RA	mrg-binding protein [Source:VB External Description;Acc:AAEL012990]	up	2.66079	919.458	2511.15		up	4.75308	3103.98	6.1831							up	1.52711	0.0122073	4018.47
CUST_10869_PI424980000	AAEL007999-RA	conserved hypothetical protein [Source:VB External Description;Acc:AAEL007999]	up	2.9455	2096.75	236.407		up	2.39705	0.00201341	2811.62							up	1.85994	0.0135697	547.728
CUST_9249_PI424980000	AAEL004526-RA	conserved hypothetical protein [Source:VB External Description;Acc:AAEL004526]	up	2.58424	121.013	83.941		up	2.59362	610.203	31.2157							up	2.19553	0.0135046	5436.53
CUST_5867_PI424980000	AAEL001412-RA	conserved hypothetical protein [Source:VB External Description;Acc:AAEL001412]	up	2.99508	0.45852	0.901645		up	2.54909	3698.19	8.92366							up	2.22004	0.0187465	0.00140097
CUST_13878_PI424980000	AAEL006600-RC	juvenile hormone-inducible protein, putative [Source:VB External Description;Acc:AAEL006600]	up	3.79373	373.93	64.0312		up	4.45401	1741.4	13.1631							up	3.0689	0.014491	6964
CUST_9098_PI424980000	AAEL007383-RB	secreted ferritin G subunit precursor, putative [Source:VB External Description;Acc:AAEL007383]	up	2.3669	11834.8	8.13776		up	2.25681	0.00146423	1698.92							up	2.06732	0.0160525	91.6413
CUST_13180_PI424980000	AAEL010640-RA	phosphoribosylamine-glycine ligase [Source:VB External Description;Acc:AAEL010640]	up	3.50148	1727.39	16.0008		up	2.49424	0.0019171	2614.13							up	2.0438	0.0149432	755.159
CUST_6878_PI424980000	AAEL004558-RA	tRNA (guanine-N(7)-)-methyltransferase subunit wuho [Source:VB External Description;Acc:AAEL004558]	up	2.63855	11248.3	0.754415		up	2.3212	416.059	126.454							up	2.05656	0.0103195	1971.85
CUST_6963_PI424980000	AAEL003899-RA	sugar transporter [Source:VB External Description;Acc:AAEL003899]	up	2.28471	3350.4	531.206		up	6.46719	4349.82	1505.43							up	3.28523	0.00846659	95.6521
CUST_3554_PI424980000	AAEL004859-RA	ATP-dependent RNA helicase [Source:VB External Description;Acc:AAEL004859]	up	3.37377	159.179	0.461667		up	3.97963	0.00268	4464.39							up	1.5742	0.0126354	4342.58
CUST_2673_PI424980000	AAEL013910-RA	conserved hypothetical protein [Source:VB External Description;Acc:AAEL013910]	up	7.87798	232.695	1.58422		up	16.4561	0.00110653	102.504							down	1.88334	0.0155946	846.951
CUST_2674_PI424980000	AAEL013910-RB	conserved hypothetical protein [Source:VB External Description;Acc:AAEL013910]	up	7.41994	397.368	0.586493		up	14.6152	789.234	51.2994							down	1.79603	0.0178207	0.00121618
CUST_6814_PI424980000	AAEL005620-RA	conserved hypothetical protein [Source:VB External Description;Acc:AAEL005620]	up	2.07823	616.468	137.448		down	3.89421	1640.04	0.868964							down	1.6246	0.00959874	1488.5
CUST_10936_PI424980000	AAEL010392-RA	hypothetical protein [Source:VB External Description;Acc:AAEL010392]	down	2.51892	266.004	2.31448		down	2.25967	752.399	454.961							up	2.44237	0.0142051	661.601
CUST_227_PI424980000	AAEL003201-RA	Carboxy-choline alpha esterase CCEAE5C	down	3.44033	2126.18	243.065		down	8.34892	1377.6	5.23373							down	4.06214	0.00444702	5.80824
CUST_7116_PI424980000	AAEL004361-RA	alpha-glucosidase [Source:VB External Description;Acc:AAEL004361]	down	3.19783	2477.05	31.4308		down	4.89828	2125.89	2.51926							down	1.5418	0.0116707	3448.72
CUST_1708_PI424980000	AAEL003186-RA	hypothetical protein [Source:VB External Description;Acc:AAEL003186]	down	2.26549	5760.07	1236.94		down	3.87919	0.00533986	0.00127319							down	2.41976	0.0158949	8813.8
CUST_2276_PI424980000	AAEL012272-RB	fk506 binding protein [Source:VB External Description;Acc:AAEL012272]	down	2.47488	53.882	1.26321		down	2.46116	0.0018168	2393.44							down	1.50664	0.00846659	79.5805
CUST_10905_PI424980000	AAEL014920-RA	lipase 1 precursor [Source:VB External Description;Acc:AAEL014920]	down	2.39093	0.00453364	0.00205781		down	2.4738	0.00205101	289.362							down	2.9306	0.00846659	7.44292
CUST_12870_PI424980000	AAEL010292-RA	conserved hypothetical protein [Source:VB External Description;Acc:AAEL010292]	down	2.20514	6981.43	1686.51		down	2.01674	0.00499513	0.00115608							down	1.76866	0.0168917	0.00104533
CUST_13464_PI424980000	AAEL008858-RA	deoxyribonuclease I, putative [Source:VB External Description;Acc:AAEL008858]	down	2.18357	2854.04	399.521		down	2.56177	3528.13	8.33216							down	2.25828	0.0112553	2990.56
CUST_13521_PI424980000	AAEL009782-RA	brain chitinase and chia [Source:VB External Description;Acc:AAEL009782]	down	2.18957	123.588	0.263971		down	2.42235	3821.54	100.185							down	1.56223	0.00846659	812.668
CUST_12289_PI424980000	AAEL007843-RA	symbol, putative [Source:VB External Description;Acc:AAEL007843]	down	2.10033	11834.8	8.12941		down	2.13009	0.00105801	94.6219							down	1.81764	0.0112033	2822.96
CUST_13881_PI424980000	AAEL001286-RA	predicted protein [Source:VB External Description;Acc:AAEL001286]	down	9.05841	0.45852	8.89066		down	5.11753	6593.91	362.906							down	3.93598	0.0109289	2316.83
CUST_10394_PI424980000	AAEL012153-RA	conserved hypothetical protein [Source:VB External Description;Acc:AAEL012153]	down	2.30751	1066.52	66.8911		down	2.0785	4233.59	13.2988							down	2.14506	0.0176837	0.00119068
CUST_13692_PI424980000	AAEL009330-RA	carbonic anhydrase II, putative [Source:VB External Description;Acc:AAEL009330]	down	2.95029	0.00577835	0.0027778		down	2.52126	0.00481823	0.00108014							down	2.45289	0.0196743	0.00159285
CUST_10008_PI424980000	AAEL011547-RA	metalloproteinase, putative [Source:VB External Description;Acc:AAEL011547]	down	2.0113	73.5594	182.943		down	4.86739	1741.4	11.0423							down	2.62127	0.0184752	0.00135992
CUST_13121_PI424980000	AAEL005531-RA	venom allergen [Source:VB External Description;Acc:AAEL005531]	down	5.37179	0.00206066	7503.05		down	2.3215	0.00624351	0.00159245							down	2.63312	0.0164218	977.953
CUST_5645_PI424980000	AAEL009431-RA	mitochondrial ribosomal protein, L10, putative [Source:VB External Description;Acc:AAEL009431]	down	2.21854	1634.73	1421.05		down	2.08454	3180.49	64.3348							down	1.68138	0.012402	4195.98
CUST_12643_PI424980000	AAEL008708-RA	lysosomal pro-X carboxypeptidase, putative [Source:VB External Description;Acc:AAEL008708]	down	2.61868	25.6732	2.04765		down	2.52944	0.0029211	505.996							down	2.79814	0.0175823	0.00114454
CUST_5747_PI424980000	AAEL014916-RA	lipase 1 precursor [Source:VB External Description;Acc:AAEL014916]	down	3.93558	1921.29	198.161		down	5.14691	4383.05	158.868							down	4.68562	0.0111755	2795.91
CUST_6163_PI424980000	AAEL015391-RA	gamma glutamyl transpeptidases [Source:VB External Description;Acc:AAEL015391]	down	2.60693	698.055	1684.76		down	3.84934	2911.16	5.58977							down	2.69658	0.0148119	743.442
CUST_7929_PI424980000	AAEL008604-RA	zinc carboxypeptidase [Source:VB External Description;Acc:AAEL008604]	down	2.94046	2568.1	33.5896		down	4.59021	7.85784	0.0588106							down	2.40801	0.00726305	311.051
CUST_3585_PI424980000	AAEL005781-RA	hypothetical protein [Source:VB External Description;Acc:AAEL005781]	down	5.95134	0.00160646	5338.69		down	4.97232	9101.82	682.239							down	2.82767	0.00846659	90.3471
CUST_3029_PI424980000	AAEL011112-RC	alcohol dehydrogenase [Source:VB External Description;Acc:AAEL011112]	down	2.77593	542.155	11300.8		down	3.45139	4058.87	118.361							down	2.81829	0.016262	939.085
CUST_706_PI424980000	AAEL008939-RA	conserved hypothetical protein [Source:VB External Description;Acc:AAEL008939]	down	6.02145	1112.13	73.9182		down	6.03491	154.474	0.713761							down	5.20632	0.0191292	0.00144184
CUST_424_PI424980000	AAEL011922-RA	serine-type enodpeptidase, [Source:VB External Description;Acc:AAEL011922]	down	3.78188	448.719	0.842209		down	8.2213	266.906	42.0195							down	4.42665	0.00841358	60.2609
CUST_3027_PI424980000	AAEL011112-RA	alcohol dehydrogenase [Source:VB External Description;Acc:AAEL011112]	down	2.82153	56.8417	12140.3		down	3.77711	7013.84	412.663							down	2.80883	0.0176059	0.00115896
CUST_3815_PI424980000	AAEL009463-RA	hypothetical protein [Source:VB External Description;Acc:AAEL009463]	down	2.56325	3703.49	622.545		down	2.53442	0.00143036	1636.13							down	2.79482	0.0130455	503.839
CUST_731_PI424980000	AAEL001306-RA	conserved hypothetical protein [Source:VB External Description;Acc:AAEL001306]	down	6.30058	93.6444	52.6219		down	3.89364	0.00320759	5846.06							down	5.62783	0.0112162	2884.17
CUST_771_PI424980000	AAEL004292-RA	hypothetical protein [Source:VB External Description;Acc:AAEL004292]	down	4.07421	6094.08	1351		down	2.03692	0.00196956	2732.19							down	2.74348	0.0185297	0.00136691
CUST_429_PI424980000	AAEL008963-RA	tyrosine aminotransferase [Source:VB External Description;Acc:AAEL008963]	down	2.73915	562.025	16.0287		down	2.28776	0.00342098	6442.21							down	2.43217	0.00666947	230.031
CUST_6879_PI424980000	AAEL003599-RA	conserved hypothetical protein [Source:VB External Description;Acc:AAEL003599]	down	3.42411	562.025	15.9292		down	4.11601	175.815	14.9837							down	3.71469	0.00880021	1130.65
CUST_9522_PI424980000	AAEL006342-RC	epoxide hydrolase [Source:VB External Description;Acc:AAEL006342]	down	3.246	1603.48	137.58		down	3.56281	0.00229885	3519.45							down	1.65325	0.0156165	853.414
CUST_748_PI424980000	AAEL003027-RA	conserved hypothetical protein [Source:VB External Description;Acc:AAEL003027]	down	14.8793	12206.8	8.50234		down	4.1348	0.00510424	0.00118953							down	1.78039	0.0142051	6545.37
CUST_443_PI424980000	AAEL005749-RA	lysosomal alpha-mannosidase (mannosidase alpha class 2b member 1) [Source:VB External Description;Acc:AAEL005749]	down	5.38902	230.262	1.44696		down	7.28723	164.582	0.937603							down	3.17553	0.0139186	6065.16
CUST_3028_PI424980000	AAEL011112-RB	alcohol dehydrogenase [Source:VB External Description;Acc:AAEL011112]	down	2.7778	7500.82	1878.15		down	3.43768	674.497	377.782							down	2.84096	0.0199981	0.001657
CUST_402_PI424980000	AAEL001069-RA	histone deacetylase [Source:VB External Description;Acc:AAEL001069]	down	3.38874	11834.8	8.11915		down	4.60824	0.00100429	87.2834							down	1.6624	0.0184752	0.00135577
CUST_2445_PI424980000	AAEL002026-RA	protein serine/threonine kinase, putative [Source:VB External Description;Acc:AAEL002026]	down	3.57023	0.00327215	0.00137766		down	4.22364	846.093	582.075							down	1.79519	0.0182413	0.00131048
CUST_1464_PI424980000	AAEL002725-RA	conserved hypothetical protein [Source:VB External Description;Acc:AAEL002725]	down	2.52609	333.134	522.144		up	22.5648	986.634	830.722							down	2.15104	0.0142051	655.829
CUST_1997_PI424980000	AAEL012560-RA	serine collagenase 1 precursor, putative [Source:VB External Description;Acc:AAEL012560]	down	2.12962	40.7599	72.3581		down	3.08803	1952.89	18.0871							down	3.05141	0.0108479	225.32
CUST_63_PI424980000	AAEL015654-RA	cytochrome P450 [Source:VB External Description;Acc:AAEL015654] CYP6AG8	down	2.88382	4849.25	951.445		down	9.0952	1741.4	13.2145							down	4.77472	0.0176837	0.0011916
CUST_6582_PI424980000	AAEL000640-RA	alanine-glyoxylate aminotransferase [Source:VB External Description;Acc:AAEL000640]	down	5.1373	6616.47	1556.87		down	11.7137	266.906	4.60599							down	1.70781	0.0107838	2216.79
